# Supplementary material for: A Network Model for Characterizing Brine Channels in Sea Ice
Source: Copernicus journal article supplement (doi:10.5194/tc-2017-169), 2017-08-21
Supplement: Supplementary file [file tc-2017-169-AC3-supplement.pdf]

## RESPONSES TO REFEREE 1

### General Comments:

This paper presents a topological and statistical analysis of novel three dimensional images of sea ice microstructure. In this paper, a directed graph is mapped to the microstructure of the sea ice and a throat size assigned to each node from the semi-minor axis of a best fit ellipse around a brine pocket viewed from a horizontal slice. Edges are assigned when moving through the ice if a brine pocket continues immediately below the previous elevation. Edges themselves can represent a splitting or joining of a brine channel depending on the overlap of the pockets being compared. Using this network model, statistical analysis is carried out relating morphological characteristics to depth and temperature. The results of the analysis are consistent with observed characteristics of sea ice microstructure for both columnar and frazil ice. The analysis presented here is then to be used as a basis for model development.

This paper presents an extensive analysis of rare and difficult to obtain microstructural data. Sea ice microstructure moderates a broad range of physical processes in both the Arctic and Antarctic. As a result, this statistical analysis should be of broad interest to polar science community. Overall, the analysis is well thought out, and well executed. I recommend this paper for publication with the following specific issues being addressed and or considered. I might also suggest the authors carefully read through the manuscript, there are sporadic minor grammatical errors.

We thank Referee #1 for the overall comments and thorough review of the manuscript.

### Specific Comments:

Page 1, Line 1: “The brine network in sea ice is a complex labyrinth whose. . .” I understand what you are trying to get at here but the description is not completely accurate. A labyrinth would imply that there is no order to the channel development, this is not the case. It might be better to say something like, “The brine pore

space in sea ice can form complex connected structures whose geometry is critical in the governance of important physical transport processes between the ocean, sea ice and surface.”

We have made the recommended change to the first sentence of the abstract in the revised manuscript.

**Page 2, Line 32:** “since viewed in two-dimensional slices” I think it would be prudent to add the fact that these are horizontal slices for clarity.

We have added the word “horizontal” in front of slices in the revised manuscript.

**Page 3, Line 4:** “This definition captures both the location and the size of the brine phase at any point. . .” Im not sure I understand this. The brine phase refers to the whole of the brine pore space. I think you might mean that it captures the location and size of a brine pocket at any point. However, this is a 2d slice so you may want to find some other type of phrasing.

We thank Referee #1 for identifying this confusing terminology. We edited the last sentence of this paragraph and the sentence now reads as follows:

*This definition captures both the location and quantity of the brine at any point in the sea ice.*

**Page 3, Near Line 25:** The probability of remaining notation is a bit awkward and phrasing confusing. Saying you are counting the number of connections made me think of the total number of connections that can trace back to that pocket. How about: For example, to calculate the probability that brine pockets of a given size remain we simply divide the number of pockets for a fixed throat size  $r$  that connect once from  $z_i$  to  $z_{i+1}$  by the total number of pockets of that size. Markov chain: I agree that the network model is representing a Markov chain, and that seems to make sense, it should be that way physically I think. But is there a physical justification that this is true? I believe it would strengthen the paper.

We have edited the definition of calculating the probability of remaining in the revised manuscript as suggested by Referee #1. In regards to the Markov chain, we agree that it seems to make sense physically due to the downward growth mechanism of sea ice. However, a complete justification is beyond the scope of this paper.

**Section 3 Results: You might want to add a reference with definitions of the some of the quantities listed in Figure 2.**

We have added the sentence below to the start of Section 3, referencing definitions for all quantities listed in Figure 2.

*We first used standard morphological metrics as defined in previous work to describe the brine network shape and size (Lieb-Lappen et al., 2017)*

**Page 4, Line 7: “but instead produces a slush that has x-ray attenuating properties between ice and brine”. Is the slush in the pore space? The wording makes it sounds as if the whole thing is slush, that of course would not make sense at -7 C. It becomes clear later, but saying that the slush is in the pore space immediately would make things clearer. Could it also be that at the bottom of the core you had more brine leakage at the time of extraction? In this case, what was in the brine space may have been less saline and thus slushy at the in-situ temperatures.**

We have added a a clarification that the slush is in the pore space. During extraction, we did not notice any brine leakage, but we also can not definitively state that there was none. It is possible that the brine space may have been less saline and thus slushy at the in-situ temperatures but we have no direct observations to support this statement.

**Page 4, Line 11: It would be helpful to describe what is meant by “as best as possible”.**

We have edited the identified sentence to be more accurate, and the sentence reads as follows in the revised manuscript:

*We used segmentation thresholds that split the difference with a threshold halfway between the peak of the brine phase and the peak of the ice phase,*

*recognizing that there was indeed error in segmentation for these warmer samples.*

**Page 4, Line 27: “Salinity Values Measured in the Field” Were these bulk salinity measurements from adjacent cores? That should be stated if so.**

We thank Referee #1 for catching this error. Bulk salinity was estimated from ion chromatography measured chloride concentrations. The identified paragraph has been edited and now starts as follows:

*We compared the  $\mu$ CT-measured brine volume fraction to expected values derived from the Frankenstein and Garner relationship relating temperature, salinity, and brine volume fraction (Frankenstein and Garner, 1967; Cox and Weeks, 1983). For this analysis, we used the core temperatures measured in the field and salinity values estimated from ion chromatography measured chloride concentrations presented in Lieb-Lappen and Obbard (2015).*

**Page 5, Line 13: “This is an important observation since we did not record the vertical orientation of the samples during cutting” Cant you tell by the direction of splitting, or are the samples too small to see that structure?**

The samples were indeed too small to see that structure. We know the orientation of the vertical  $z$ -axis. However, unfortunately we did not have the direction of the vertical  $z$ -axis.

**Page 5, Line 21: Change maximize to maximum.**

We have made the recommended change in the revised manuscript.

**Page 5, Line 22: The description of Figures 8 and 9 should be rethought and made more clear. It is not clear to me what the unsorted figures represent. I assume node index is just a way to label each node and to me it seems arbitrary. Ordering them by size makes sense but what gives the unsorted part of the figure any relevance? I think a description of how each node is labeled in the unsorted figure is needed to understand what it is meant to represent. Is it done by physical distance from the node with the**



largest throat size? It was not clear to me. This may all be fixed by clearly defining “node index” which I did not see in the figure.

We have edited the language to clearly define the sorting in Figures 8 and 9 in the revised manuscript. The following has been added to the captions for Figures 8 and 9:

*The left panels show the throat sizes at each depth in the sample with nodes sorted by location, not by size. The right panel sorts the nodes by throat size in descending order.*

Additionally, the third paragraph of section 4.2 now starts as follows:

*To gain insight into the behaviour of a channel, we visualized the number of branches and distribution of throat sizes by plotting the throat size  $r_i$  of each node  $p_i$  for the largest brine channel. Fig. 8 and Fig. 9 shows the throat sizes as a function of depth in the sample for three different representative sample depths: top, middle, and bottom of the Butter Point and Iceberg Site cores, respectively. For each channel shown, there is a plot of  $\{r_i\}$  at each depth sorted by physical location in a two-dimensional grid (working line by line), not by size. A second corresponding plot shows node sizes sorted by descending  $\{r_i\}$  for a given depth in the channel. The first plots illustrate the connectivity of given branches, while the second plots provide a visualization of the distribution of  $r_i$ .*

**Page 10, Line 22:** “The probability distributions shown represent a sampling of the various possibilities. . .” Consider rephrasing, maybe change possibilities to microstructural behaviors? For your future model development, you might want to consider the effect salinity might have on the statistics you consider. It is encouraging to see that the other two previous cores you use do follow the most recent though. However, in the Arctic summer snow melt can get into the pore space decreasing salinity and reducing permeability. Just a thought.

We have made the recommended change to the identified sentence. We thank Referee #1 for the observation in regards to future model development and will indeed strive to include salinity in future development.

**Figure 1: A figure showing how a split or join is assigned would be nice but is not completely necessary.**

We thank Referee #1 for this suggestion but we feel as though the written description of a split and a join was sufficient and did not require an additional figure.

**Figure 2: Rename object volume to brine volume fraction?**

We have made the suggested recommendation in the revised manuscript.

**Figure 14: Just a comment, the up and down motion might be able to be captured if you had someway to include horizontal edges in your network model.**

We thank Referee #1 for this observation. We are intrigued by a definition for a horizontal edge, but it is not possible with the model as currently defined.

**Figure 15: Connecting the dots with thin lines may make the figure easier to read, not sure, it is ok as is though.**

With so many values having zero probability or no data, we made the stylistic choice to not include thin lines between the dots.

#### **Technical Corrections:**

**Page 1, Line 25: produces should be produce. “Since different growth rates in natural sea ice produce. . .”**

We thank Referee #1 for catching this error and have made the recommended revision.

**Page 4, Line 4: Remove the word “sufficiently”**

We have removed the word “sufficiently” in the revised manuscript.

**Page 4, Line 6: change “this ambient cooling” to “the ambient temperature”.**

We have made the recommended revision in the revised manuscript.

**Page 5, Line 21: Change maximize to maximum.**

We have made the recommended change in the revised manuscript.

**Figure 10: X-axis title is cut off a bit.**

We have fixed the X-axis in Figure 10 in the revised manuscript.

**Figure 11: In the caption “black squares” should be “blue squares”.**

We thank Referee #1 for catching this oversight and have edited the caption to read “filled squares”.

## **RESPONSES TO REFEREE 2**

### **General Comments:**

This is potentially a useful paper based on producing a network model of sea ice brine microstructure. However, I have found it extremely difficult to review. My main criticism being that based on network theory as it is, and with many of the references relating to this (e.g. Newman, 2011; Pierret et al. 2002; Delerue et al. 2003), much of the terminology and techniques will be completely unfamiliar to the general reader of *The Cryosphere*. I believe therefore that before full publication the manuscript needs to be restructures in a form that will make it much less opaque to readers who are not familiar with the methods presented. Without this I feel that any impact that it might have will be substantially diminished. I give below a series of specific comments which are intended to indicate what I see are some of the major issues and, in part, how they might be addressed. The first three comments relate to what I believe should be a standard introduction to the sampling and presentation of the initial measurements.

We thank Referee #2 for the overall comments and thorough review of the manuscript. We have significantly rewritten the methods section in the revised manuscript to make it more accessible to a wider readership.

## Specific Comments:

**1. Please describe the ice cores. In other words, in each core, what was the thickness of frazil ice at the top, the thickness of columnar ice beneath, and any indication of platelet ice at the base? This is important in terms of reference for the interpretation of the inferred microstructure.**

Full descriptions of the ice cores including frazil, columnar, and platelet fractions were reported in previous papers (Obbard et al., 2016 and Lieb-Lappen et al., 2017). We have added two sentences to the first paragraph of the methods section stating these fractions and referencing the relevant papers. The first paragraph of the methods section now starts as follows:

*This work will focus on two of the ice cores extracted from different locations in the Ross Sea, Antarctica during a October - November 2012 field campaign. The 1.78 m Butter Point ice core was collected at 77°35.133' S and 164°48.222' E and had a temperature gradient ranging from  $-16.1^{\circ}\text{C}$  at the top to  $-2.5^{\circ}\text{C}$  at the bottom. For this core, the top 14 cm was frazil ice, the columnar ice region was from 14 cm to 65 cm, and platelet ice formed the bottom 64% (Obbard et al., 2016). The 1.89 m Iceberg Site ice core was located at 77°7.131' S and 164°6.031' E and had a temperature gradient ranging from  $-17.7^{\circ}\text{C}$  at the top to  $-2.3^{\circ}\text{C}$  at the bottom. Relative to the Butter Point core, the Iceberg Site core had more frazil ice (0 cm to 30 cm), more columnar ice (30 cm to 137 cm) and less platelet ice (137 cm to 189 cm) (Obbard et al., 2016).*

**2. Were the cores sampled on site or after transportation? If the latter then please give details of how the cores were treated between extraction and sampling.**

Cores were imaged after transportation and stored in a  $33^{\circ}\text{C}$  cold room. We have added the following sentences to the first paragraph of the methods section in the revised manuscript:

*Immediately following core extraction, we recorded the temperature profile at 10-cm intervals, and stored the cores in a  $20^{\circ}\text{C}$  freezer at McMurdo station prior to shipping. We then transported the cores at a constant temperature of  $20^{\circ}\text{C}$  back to Thayer School of Engineerings Ice Research Laboratory at*

*Dartmouth College, and stored them in a 33 °C cold room prior to analysis.*

3. In section 3, with reference to Figures 2 and 3, please explain what the different parameters plotted are, what you might expect them to show, and how they relate to each other. For example, what is expected to be the relationship between brine volume fraction and specific surface area (Spor). In investigating permeability in sandstone samples Zhang and Weller (2014)\* have demonstrated that there is a relationship between fractal dimension and Spor. Would any such relationship be expected here? Explain the Euler number for those unfamiliar with it. How is the degree of anisotropy derived? Given that the lower parts of the cores are explained to have a significant degree of uncertainty associated with the measurements (quantify this?) does it make sense for the scales for Euler number and connectivity to be dictated by the lowermost samples? \*Zhang & Weller, 2014. Geophysics, 79, D377-D387. The above comments are in fact relatively introductory and indicate the need for a clear explanation of the background to the study, how the initial sampling was carried out, and what the initial measurements show. Unfortunately I find that from this point onwards the manuscript becomes confusing and is not at all well explained or illustrated for the more general reader.

In the revised manuscript we decided to remove the Euler number, connectivity, and fractal dimension. Thus, we were able to condense Fig. 2 and Fig. 3 into a single figure in the revised manuscript. Additionally, although full descriptions of all metrics were referenced (Lieb-Lappen et al., 2017), we revised the second paragraph of the results section to include clearer explanation of these metrics in this manuscript as well. This paragraph now reads as follows in the revised manuscript:

*Since the cooling stage did not significantly warm samples beyond  $-7^{\circ}\text{C}$ , we were not surprised that general trends shown in Fig. 2 for all metrics did not differ significantly from the same samples scanned isothermally and presented in Lieb-Lappen et al. (2017) as the percolation threshold was not crossed. As in Lieb-Lappen et al. (2017), we used the structure model index ( $\text{SMI} = 6 \left( \frac{S' \times V}{S^2} \right)$ ), where  $S'$  is the derivative of the change in surface area after a one pixel dilation,  $V$  is the initial volume, and  $S^2$  is the initial surface*

area) to quantify the similarity of the brine phase to plates, rods, or spheres. To quantify size, we calculated a structure thickness by first identifying the medial axes of all brine structures and then fit the largest possible sphere at all points along said axes. The structure thickness is defined as the mean diameter of all spheres over the entire volume. The structure separation is the inverse metric, providing a measurement on the spacing between individual objects. We then calculated the degree of anisotropy by finding the mean intercept length for a large number of line directions, and forming an ellipsoid with boundaries defined by these lengths. The eigenvalues for the matrix defining this ellipsoid are calculated, and correspond to the lengths of the semi-major and semi-minor axes. The ratio of the largest to smallest eigenvalues then provides a metric for the degree of anisotropy, with 0 representing a perfectly isotropic object and 1 representing a completely anisotropic object. We observed that the brine phase specific surface area increased with depth, structure model index was roughly 3 (indicative of cylindrical objects), structure thickness decreased, structure separation increased, and the degree of anisotropy increased throughout the middle of the core (Fig. 2). From the metrics above, we conclude that brine channels are primarily cylindrical in shape with more branches at lower depths, consistent with previous observations (Lieb-Lappen et al., 2017).

**4. I find section 4.2 extremely confusing, including the figures that accompany it. Figures 5 and 6 ostensibly show the 5 “largest” brine channels from each of the two cores. I assume that one row represents 1 brine channel shown as a sequence of samples through the core in depth order. However, the colour scale suggests that the throat size goes to zero at many points i.e. a pore terminates. I find this hard to understand in the context of the fact that a single row represents a “large” brine channel. Please clarify. The discussion on branches, with reference to Figure 7, is similarly very confusing. In Figure 7 what is the horizontal scale for each separate line representing a brine channel? What is the significance of the fact that one brine channel appears to pass almost right through a sample but the others do not? I cannot at all understand the significance of Figures 8 and 9.**

We thank Referee #2 for noting this potentially confusing section. In fact, there is not a connection from the 5 brine channels selected at one depth to

the 5 brine channels selected at the next depth. The reasoning is that we did not scan the entire length of the ice core. Even if we had, we would not have been able to fully track a brine channel from one sample to the next. We have added the sentence below alerting readers of this fact to avoid further confusion. Referee #2 is correct in observing that many of the selected brine channels do terminate and do not continue to the next depth. Further, we have removed the confusing Figure 7 from the revised manuscript in part due to the suggestion in the next comment and in part because it is not essential to the presented work. Fig. 8 and 9 (now Fig. 6 and 7 in the revised manuscript) are directed to the visual learners to illustrate both the magnitude and distribution of throat sizes. We have previously revised the captions to these Figures to make them clearer in response to Referee #1.

*We note that since the entire length of the cores were not scanned, there is no correlation between the five brine channels selected from one subsample (e.g. 20-cm depth) to to the next (e.g. 30-cm depth).*

**5. Similar comments apply to sections 4.3, 4.4 and 4.5, and their associated Figures. An excellent example of network terminology that will be unfamiliar to most is the statement “. . .treated the network as a directed graph. . .” etc. In essence therefore, although I believe that the work presented is ultimately publishable, to be so requires considerable restructuring of the manuscript and I urge the authors to do this. There needs to be a much clearer explanation of the techniques, probably a reduction in the number of figures including clear explanations of what they represent. A somewhat broader review of previous work on looking at the inter-connectness of brine channels in sea ice would also not be remiss.**

In the revised manuscript we have completely rewritten the methods section and have provided better description of the network terminology. We feel as though this will help clarify the confusion in sections 4.3, 4.4, and 4.5. However, we have also added a reminder to the reader in section 4.5 that a directed graph in our model is one that allows fluid to flow downwards from node to node but not upwards. Throughout these sections, we have reduced the use of network terminology and/or provided better explanations in these instances. In regards to the number of figures, we have cut Fig. 3 and Fig. 7 from the original submission. Finally, we have added the following paragraph

to the introduction in the revised manuscript.

*Network models have successfully been employed in a variety of fields to describe complex phenomena and predict future behaviour, in particular fluid flow in porous media (e.g., Golden et al. , 1997, Berkowitz and Balberg, 1992, and Fatt, 1956). Specific to sea ice, Freitag (1999) utilized a Lattice-Boltzmann model to model fluid flow through sea ice. Meanwhile, Golden (1998) examined critical percolation thresholds in their network model of sea ice. More recently, Zhu et al. (2006) used a two-dimensional pipe network model to simulate fluid flow through sea ice using a fast multigrid method. This network compared well with lab data for porosity above 0.15, but overestimated permeability at lower porosities Golden (Golden2007). The majority of these models generate connectivity networks based on bulk brine properties. Here we derive finer-grained statistics empirically, allowing for models to more closely align with the physical properties of sea ice.*



# A Network Model for Characterizing Brine Channels in Sea Ice

Ross M. Lieblappen<sup>1,2</sup>, Deip D. Kumar<sup>3</sup>, Scott D. Pauls<sup>4</sup>, and Rachel W. Obbard<sup>1</sup>

<sup>1</sup>14 Engineering Drive, Thayer School of Engineering, Dartmouth College, Hanover, NH, USA

<sup>2</sup>124 Admin Drive, Vermont Technical College, Randolph Center, VT, USA

<sup>3</sup>6211 Sudikoff Lab, Department of Computer Science, Dartmouth College, Hanover, NH, USA

<sup>4</sup>27 N. Main Street, Department of Mathematics, Dartmouth College, Hanover, NH, USA

*Correspondence to:* Ross M. Lieblappen (Ross.Lieb-Lappen@vtc.vsc.edu)

**Abstract.** The brine ~~network-pore space~~ in sea ice ~~is a complex labyrinth whose precise microstructure can form complex connected structures whose geometry~~ is critical in ~~governing the movement of brine and gas~~ the governance of important physical transport processes between the ocean ~~and the sea ice~~, sea ice, and surface. Recent advances in three-dimensional imaging using x-ray micro-computed tomography have enabled the visualization and quantification of the brine network morphology and variability. Using imaging of first-year sea ice samples at in-situ temperatures, we create a new mathematical network model to characterize the topology and connectivity of the brine channels. This model provides a statistical framework where we can characterize the pore networks via two parameters, depth and temperature, for use in dynamical sea ice models. Our approach advances the quantification of brine connectivity in sea ice, which can help investigations of bulk physical properties, such as fluid permeability, that are key in both global and regional sea ice models.

## 1 Introduction

The detailed microstructure of sea ice is critical in both governing the movement of fluid between the ocean and the sea ice surface and controlling processes such as ice growth and decay (Thomas and Dieckmann, 2009; Petrich et al., 2006). Its complex pore structure influences many of the bulk thermal and electric properties of sea ice. The permeability is of primary interest to a wide range of disciplines (e.g., biology and atmospheric chemistry) as it controls fluid flow through sea ice. The “Rule of Fives” provides a guideline for describing the percolation threshold in first-year columnar sea ice. Specifically, the ice becomes permeable to fluid transport at brine volume fractions greater than 5%, which are found in ice at about  $-5^{\circ}\text{C}$  with a salinity of about 5 parts per thousand (Golden et al., 1998). Although this rule of thumb is helpful in describing and modeling basic phenomenon, it does not fully capture the spatially and temporally evolving details of the sea ice microstructure. Here we provide a more topologically complete characterization of sea ice pore structure.

Previous research has recognized the importance of thermally activated percolation thresholds (e.g., Cox and Weeks, 1975; Weeks and Ackley, 1982; Golden et al., 1998; Thomas and Dieckmann, 2009). Pringle et al. (2009) studied single-crystal laboratory-grown ice using  $\mu\text{CT}$  to examine the thermal evolution of brine inclusions. They found that brine volume fraction and pore space structure depend upon temperature, with a percolation threshold observed at  $4.6 \pm 0.7\%$ . However, one expects natural polycrystalline ice to have a higher threshold as pathways are sensitive to grain boundaries, flaws, and a certain degree

of horizontal transport (Pringle et al., 2009). Since different growth rates in natural sea ice ~~produces~~produce different average spacing between brine layers, there is also the potential for varying percolation thresholds and degree of connectivity with depth (Nakawo and Sinha, 1984; Petrich et al., 2006; Pringle et al., 2009).

5 Network models have successfully been employed in a variety of fields to describe complex phenomena and predict future behaviour, in particular fluid flow in porous media (e.g., Golden, 1997; Berkowitz and Balberg, 1992; Fatt, 1956). Specific to sea ice, Freitag (1999) utilized a Lattice-Boltzmann model to model fluid flow through sea ice. Meanwhile, Golden et al. (1998) examined critical percolation thresholds in their network model of sea ice. More recently, Zhu et al. (2006) used a two-dimensional pipe network model to simulate fluid flow through sea ice using a fast multigrid method. This network compared well with lab data for porosity above 0.15, but overestimated permeability at lower porosities (Golden et al., 2007). The majority of these models generate connectivity networks based on bulk brine properties. Here we derive finer-grained statistics empirically, allowing for models to more closely align with the physical properties of sea ice.

In this manuscript, we develop a methodology for describing the morphology and variability of brine networks in a vertical column of first-year sea ice. We construct a network model of the pore structure of sea ice and use topological techniques to  
15 characterize this brine network. This yields a set of network statistics that characterizes channels of different depths and temperature, which we can later use to inform more sophisticated models of sea ice. Our framework enables us to statistically replicate the pore structure of sea ice at different depths and temperatures. Future applications include refining under what conditions the “Rule of Fives” applies, predicting bulk physical properties such as heat transfer and fluid permeability, and improving the ability to describe processes such as brine drainage and desalination. This approach provides advances in quantifying the brine  
20 connectivity in sea ice, which we can then incorporate into both global and regional sea ice models.

## 2 Methods

This work will focus on two of the ice cores extracted from different locations in the Ross Sea, Antarctica during a October - November 2012 field campaign. The 1.78 m Butter Point ice core was collected at 77°35.133' S and 164°48.222' E and had a temperature gradient ranging from −16.1 °C at the top to −2.5 °C at the bottom. For this core, the top 14 cm was frazil ice, the columnar ice region was from 14 cm to 65 cm, and platelet ice formed the bottom 64% (Obbard et al., 2016). The 1.89 m Iceberg Site ice core was located at 77°7.131' S and 164°6.031' E and had a temperature gradient ranging from −17.7 °C at the top to −2.3 °C at the bottom. Relative to the Butter Point core, the Iceberg Site core had more frazil ice (0 cm to 30 cm), more columnar ice (30 cm to 137 cm) and less platelet ice (137 cm to 189 cm) (Obbard et al., 2016). Immediately following core extraction, we recorded the temperature profile at 10-cm intervals, and stored the cores in a −20 °C freezer at McMurdo station prior to shipping. We then transported the cores at a constant temperature of −20 °C back to Thayer School of Engineering’s Ice Research Laboratory at Dartmouth College, and stored them in a −33 °C cold room prior to analysis. Cubic sub-samples measuring 1 cm on edge were taken from each core at 10-cm intervals. We used x-ray micro-computed tomography ( $\mu$ CT) to image each sub-sample following the protocol developed by Lieb-Lappen et al. (2017). We scanned each sub-sample from  
30

these two cores at in-situ temperatures using a Peltier cooling stage attached to our Skyscan 1172  $\mu$ CT scanner, and analyzed the three-dimensional morphological data.

Using the methods described in detail in Lieb-Lappen et al. (2017), we converted the binarized images depicting of the brine phase into a network model. A to a simplified representation as a network. Network models are now ubiquitous across many fields as they provide mathematical descriptions of complex phenomena that are amenable to detailed analysis. Abstractly, a network is a collection of nodes and edges connecting the various nodes (Newman, 2011). Scientists and mathematicians use networks in a wide variety of fields to create simple representations of real-world systems, from which they can capture critical features and model particular behavior of the system. For example, nodes,  $N$ , and edges,  $E$ . Most generally, an edge is an ordered pair of nodes,  $e = (i, j)$ , signifying a connection flowing from node  $i$  to node  $j$ . The network we build for our application captures the structure of the brine channels, but without all of the finest details. This network retains salient permeability properties of the brine network while discarding less relevant but complex fine-grained features. Our motivation is two-fold. First, the network presentation allows us to easily analyze permeability of the ice core samples in terms of network features. Second, the network structure is rich enough to provide empirical estimates for the brine pore structure in first-year sea ice at different temperatures. These estimates give a statistical description of brine channel structure which we can use to inform percolation and flow models.

Our model is, in a sense, a refinement of other network models used to study transport within sea ice. Percolation models, such as those developed to justify the “Rule of Fives” (Golden et al., 1998), rest on underlying network connectivity models of brine pockets within sections of ice. While most of these models use bulk brine properties to form a statistical basis for generating the connectivity networks, our work derives finer-grained statistics empirically, allowing for models more closely aligned with the physical properties of sea ice. This approach occurs in other related fields: soil scientists and geologists use network models of pore space to study similar problems of connectivity and permeability (e.g., Pierret et al., 2002; Delerue et al., 2003). Some of the common algorithms used in creating these networks include maximal ball, medial axis, and flow-velocity methods (Dwyer, 1993; Silin and Patzek, 2006; Dong et al., 2008). in a different porous medium (e.g., Pierret et al., 2002; Delerue et al., 2003).

Here we use a version of maximal ball where we define the nodes of the network as a collection of points in three-dimensional space  $\{p_i = (x_i^*, y_i^*, z_i^*) \in \mathbb{R}^3\}$ , with each point assigned a radius/throat size  $\{r_i\}$  (Dwyer, 1993; Silin and Patzek, 2006). By setting the network in the spatial setting of To create our network, we must identify nodes and edges between them that reflect the structure of the brine channels in the sample. To begin, we think of a sample as a cube in three dimensional space,  $\mathbb{R}^3$  with, using standard Cartesian coordinates denoted by  $(x, y, z)$ . We fix the vertical coordinate,  $z = C$ , to identify a horizontal slice of the sample at height  $C$ . For such a slice, we associate a node to each distinct brine pocket. Fig. 1 shows four horizontal slices associated to consecutive  $z$  representing the vertical direction, we can examine questions of brine movement upwards and downwards through the sea ice. We identify the nodes of the network  $\{p_i\}$  by examining the binarized horizontal slices and locating the centroids of each two-dimensional connected component in each slice. The centroids are a reasonable approximation since viewed in two-dimensional slices, brine inclusions values, that we use to describe this process. In those images, ice is grey, air is black, and brine is white in color. In the topmost image in the stack,

where  $z = z_0$ , we see 10 white regions showing the brine within that slice. To define a node associated to the  $i^{\text{th}}$  region, we consider the collection of points,  $\{(x_i^k, y_i^k, z_0)\}_k$ , that make up that region and calculate their centroid,  $p_i = (x_i^*, y_i^*, z_i^*)$ , which labels the node. Centroids are reasonable approximations of the positions of the regions since the brine inclusions in each horizontal slice are primarily convex polygons with the centroid located inside the connected component (Heijmans and Roerdink, 1998). We note that each node  $p_i$  located at  $(x_i^*, y_i^*, z_i^*)$  has a collection of points  $\{(x_i^j, y_i^j, z_i^j)\}$  (where  $z_i^j = z_i^*$  for all  $j$ ) that collectively define the two-dimensional connected component. While this label records the position of the brine region, it contains no additional information, so we record an approximation of the size of the brine channel at this  $z$ -value region along with each node. We fit an ellipse to each connected component the region and we define the length-of-the-throat size of the region, denoted  $r_i$ , by the length of its semi-minor axis-to-be the throat size  $r_i$  assigned to the respective node  $p_i$ . Thus, each brine pocket is summarized by the four-dimensional vector  $(x_i^*, y_i^*, z_i^*, r_i)$ . This definition captures both the location and the size. The red ellipses in Fig. 1 are examples of ellipses that allow us to calculate these throat sizes. Repeating this procedure for all values of  $z$  gives a complete list of nodes,  $\{p_i\}$ , in the network, with the associated throat sizes,  $\{r_i\}$ . We note that this process is a version of the *maximal ball* method (Dwyer, 1993; Silin and Patzek, 2006) for creating networks from image data. While other methods exist – e.g., random pipe, medial axis, and flow velocity methods (Zhu et al., 2006; Dwyer, 1993; Silin and Patzek, 2006; Dong et al., 2008) – our choice of method best fits the  $\mu$ CT data.

Our collection of node-throat size pairs gives an approximation of the brine phase-at-any-point-in-the-sea-ice-structure in sea ice sample but lacks an important feature - it does not specify how the brine regions are connected to one another from one horizontal slice to another. Including edges between nodes allows us to encode this feature. We define an edge from node  $p_i$  to node  $p_j$  if the pair meet two conditions: first, that node  $p_j$  appears on the horizontal slice just below that of node  $p_i$  and second, that the brine regions represented by nodes  $p_i$  and  $p_j$  overlap when projected onto the same image. We can formalize these conditions as follows. We define an edge from node  $p_i$  to node  $p_j$  if

1.  $z_j^* = z_i^* - 1$
2.  $\{(x_i^k, y_i^k)\}_k \cap \{(x_j^k, y_j^k)\}_k \neq \emptyset$ .

Over the collection of brine pockets, we calculate a series of probability distributions that capture how the brine channels evolve as we move vertically. In the language of networks (Newman, 2011), this is a *directed* edge as it points in a direction which, in this case, records the direction of our progression through the sample. For each brine pocket  $p_{i1} = (x_{i1}^*, y_{i1}^*, z_{i1}^*, r_{i1})$ , we look at the overlap between it and all the brine pockets at height  $z = z_{i1}^* - 1$ . For two nodes  $p_{i1}$  and  $p_{i2}$  located in adjacent horizontal slices  $z_{i1}^*$  and  $z_{i2}^*$  (where  $z_{i2}^* = z_{i1}^* - 1$ ), we place an edge between the two if  $\{(x_{i1}^j, y_{i1}^j)\} \cap \{(x_{i2}^j, y_{i2}^j)\} \neq \emptyset$ . If there are no intersections, the brine channel has terminated and we say the brine pocket  $p_{i1}$ . In some of our calculations, we will ignore the direction, treating the edge as signaling the bi-directional connection between the two brine regions. Figure 1 shows several edges between nodes, including one from node  $p_{i1}$  to  $p_{i2}$ , denoted by dashed black lines. In that figure, we can see that as we move from  $p_{i1}$  to  $p_{i2}$  and further down the vertical axis, the throat size of the brine channel shrinks. This is not the only behavior - some channels shrink and eventually disappear, new brine pockets sometimes appear below areas of ice. Others split into multiple distinct regions, while others still join together.

With the definition of the network in place, we next introduce terminology which helps describe the evolution of a brine channel as it progresses through an ice sample. For a fixed node  $p_i$ , if the intersections in the second part of the definition of an edge above are empty for all other nodes, we say that node has *died* moving from slice  $z = z_i^*$  to slice  $z = z_i^* - 1$ . If there is a single only one non-empty intersection, we say the brine pocket node remains. If On the other hand, if there are multiple intersections for  $p_i$  non-empty intersections, we say the brine pocket  $p_i$  splits, and record all such edges to the various adjacent nodes. Last, if more than one pocket node at height  $z$  overlaps with one pocket a single node at height  $z - 1$ , we say those pockets that those nodes join and record all incident edges. In cases where a split and join happen simultaneously, we record both (in our samples, this does not happen very often). Thus, we are able. This terminology allows us to depict the vertical connectivity of the brine phase through our definition of edges, while horizontal connectivity is captured within. Our definition precludes horizontal connectivity as the horizontal extent of a brine region is captured in the definition of the node itself and we note that there are no horizontal edges associated node. Since brine channels are primarily vertically oriented with branches splitting both upwards and downwards, this network definition yields a good model for depicting brine movement through the sample.

In Fig. 1, we illustrate the network definition by showing four two-dimensional slices from a representative sample. In all slices, black represents the air phase, white represents the brine phase, and gray represents the ice phase. Two example ellipses shown in red illustrate the definition of nodes with their corresponding radii. Black dashed lines depict the edge connecting nodes  $p_{i1}$  and  $p_{i2}$  and a few other representative edges connecting adjacent nodes. For each step downwards from a given node, the branch of the brine channel may grow or shrink, split into multiple branches, join with other branches, remain constant, or die, all with probabilities dependent upon the given node throat size, depth/temperature, and proximity to other nodes.

For a fixed pocket With this mathematical description of the brine structure, we can calculate statistics about it evolution. For a fixed throat size,  $r$ , we compute the probabilities of a node of this size remaining, dying, splitting, or joining. The probability of a node of throat size  $r$ , we can compute probability distributions from this collection of data. For example, to calculate the probability that pockets of this size remain we simply divide remaining in the next step but changing to throat size  $s$  is the number of connections  $((x_i^*, y_i^*, z_i^*), r) \rightarrow ((x_j^*, y_j^*, z_j^* = z_i^* - 1), s)$  by the total number of brine pockets of  $((x_i^*, y_i^*, z_i^*), r) \rightarrow ((x_j^*, y_j^*, z_j^* = z_i^* - 1), s)$  divided by the number of nodes of throat size  $r$  in the sample:

$$P_{\text{remain}}(r) = \frac{\#((x_i^*, y_i^*, z_i^*), r) \rightarrow ((x_i^*, y_i^*, z_i^* - 1), r)}{\# \text{pockets of size } r}$$

$\vdots$

$$P_{\text{remain}}(r \rightarrow s) = \frac{\#\{((x_i^*, y_i^*, z_i^*), r) \rightarrow ((x_j^*, y_j^*, z_j^* = z_i^* - 1), s)\}}{\#\{i | r_i = r\}}.$$

For our discussions in this paper, we aggregate these fine statistics into a single statistic recording the probability that a node of throat size  $r$  remains in the next level:

$$P_{\text{remain}}(r) = \frac{\sum_{s>0} \#\{((x_i^*, y_i^*, z_i^*), r) \rightarrow ((x_j^*, y_j^*, z_j^* = z_i^* - 1), s)\}}{\#\{i | r_i = r\}}.$$

Similarly, we can ~~compute the probability of deaths, splits, and joins~~ calculate the probabilities that nodes of size  $r$  die, split, or join. Taken together, these ~~form an annotated directed network with brine pockets as nodes and directed edges indicating the possible next steps, weighted by their probabilities. This network represents~~ probability distributions summarize the evolution of the brine channels in the ice sample statistically.

5 In summary, the set of probabilities defines a discrete-time probabilistic process. Given a node at a particular height  $z$  and throat size  $r$ , we know the possible outcomes for this node at height  $z - 1$  - remaining, dying, splitting, or joining - and the chance that they occur by looking at the approximations of the probabilities of their occurrence. In other words, taking the collection of  $\{p_i, r_i\}$  as states and the probabilities as transition probabilities, we have defined a Markov chain ~~that statistically describes the ice core~~ modeling the evolution of brine channels within the sample.

### 10 3 Results: $\mu$ CT 3-D Imaging

We first used standard morphological metrics as defined in previous work to describe the brine network shape and size (Lieb-Lappen et al., 2017). Fig. 2 shows the ~~object volume~~ brine volume fraction, definition, and shape of the brine phase for the Butter Point and Iceberg Site ice cores. The trends in the top half of the core are similar to what we expect since the temperature in the top half of the core is relatively cold and the expected brine volume fraction is small. However, at around 15 100 – 120 cm the brine volume fraction begins to increase and the expected c-shape profile begins to appear. Although this trend persists for a few samples, it does not continue as we would expect into the bottom of the core for the warmest temperature samples. This suggests that perhaps the Peltier cooling stage was not ~~sufficiently~~ warming the temperatures of those samples above approximately  $-7^\circ\text{C}$ . Since the average temperature of the cold room housing the  $\mu$ CT scanner was  $-8^\circ\text{C}$ , either the cooling stage warming mode was not functional or was overcome by ~~this ambient cooling~~ the ambient temperature.

20 This may highlight that the cooling stage is not sufficiently warming the ice, but instead produces a slush in the pore space that has x-ray attenuating properties between ice and brine. Segmenting all the slush with the brine phase (assuming it is possible to isolate only the slush from signal noise) leads to an overestimate of the brine phase and an inaccurate depiction of brine channel size and connectivity. Conversely, segmenting the slush with the ice phase leads to an underestimate of the brine phase and also an inaccurate depiction of the brine channels. We used segmentation thresholds that split the difference ~~as best as possible~~ with a threshold halfway between the peak of the brine phase and the peak of the ice phase, recognizing that there was indeed error in segmentation for these warmer samples. Thus, we will treat data points at depths below roughly 120 cm with caution. Unfortunately, this encompasses the region where the brine volume fraction crosses the 5% critical threshold, limiting our ability to examine the “Rule of Fives” in this manuscript.

Since the cooling stage did not significantly warm samples beyond  $-7^\circ\text{C}$ , we were not surprised that general trends shown 30 in Fig. 2 for all metrics did not differ significantly from the same samples scanned isothermally and presented in Lieb-Lappen et al. (2017) as the percolation threshold was not crossed. As in Lieb-Lappen et al. (2017), we used the structure model index ( $\text{SMI} = 6 \left( \frac{S' \times V}{S^2} \right)$ , where  $S'$  is the derivative of the change in surface area after a one pixel dilation,  $V$  is the initial volume, and  $S^2$  is the initial surface area) to quantify the similarity of the brine phase to plates, rods, or spheres. To quantify size, we

calculated a structure thickness by first identifying the medial axes of all brine structures and then fit the largest possible sphere at all points along said axes. The structure thickness is defined as the mean diameter of all spheres over the entire volume. The structure separation is the inverse metric, providing a measurement on the spacing between individual objects. We then calculated the degree of anisotropy by finding the mean intercept length for a large number of line directions, and forming an ellipsoid with boundaries defined by these lengths. The eigenvalues for the matrix defining this ellipsoid are calculated, and correspond to the lengths of the semi-major and semi-minor axes. The ratio of the largest to smallest eigenvalues then provides a metric for the degree of anisotropy, with 0 representing a perfectly isotropic object and 1 representing a completely anisotropic object. We observed that the brine phase specific surface area increased with depth, structure model index (~~a shape index quantifying similarity of objects to plates, rods, or spheres~~) was roughly 3 (indicative of cylindrical objects), structure thickness decreased, structure separation increased, and ~~fractal dimension was roughly 2. The~~ degree of anisotropy ~~for brine channels is presented in Fig. ??~~. As expected, the brine phase had increased anisotropy throughout ~~increased throughout~~ the middle of the core ~~. The measure of connectivity and Euler number of the brine phase given in (Fig. ?? fluctuated greatly, particularly for the sample at 170 cm in the Iceberg Site core. We present a more detailed analysis of the connectivity for the brine channels in the following section using the mathematical brine network2)~~. From the metrics above, we conclude that brine channels are primarily cylindrical in shape with more branches at lower depths, consistent with previous observations (Lieb-Lappen et al., 2017).

We compared the  $\mu$ CT-measured brine volume fraction to expected values derived from the Frankenstein and Garner relationship relating temperature, salinity, and brine volume fraction (Frankenstein and Garner, 1967; Cox and Weeks, 1983). For this analysis, we used the core temperatures measured in the field and salinity values ~~measured in the field~~ estimated from ion chromatography measured chloride concentrations presented in Lieb-Lappen and Obbard (2015). This yielded expected brine volume fractions for the two cores shown in Fig. 3. From 0 cm to 120 cm, the measured brine volume fractions match the expected values remarkably well. However, below a depth of 120 cm in both cores, the expected brine volume fraction is greater than that measured using  $\mu$ CT. For example, at a depth of 160 cm the expected brine volume fraction is 4.5 and 4.2 times greater than the values measured for samples from the Butter Point and Iceberg Site ice cores, respectively. This provides an estimate for the degree by which the cooling stage failed to heat the warmer samples in the  $\mu$ CT.

## 4 Results: Brine Network Model

### 4.1 Model Definitions

From the binarized images of the brine phase for the Butter Point and Iceberg Site ice cores, we created a mathematical network. We will use the term *network* to refer to the entire brine phase of a given sample and/or the entire brine phase of all samples in a given core. For a given sample, we define each brine *channel* to be a single connected ~~component region~~ in the brine network. The number of brine channels per sample ranged from 830 to 4800, with maximum numbers occurring in samples from the top and bottom of the cores. Previous work ~~has shown~~ showed that these brine channels often appear in layers or sheets spaced approximately 0.5 – 1.0 mm apart due to the ice growth mechanism and original skeletal structure (Weeks and



Ackley, 1982). A single brine channel is a complex web containing many different parts, which we will call the *branches* of the brine channel. ~~We will define~~ As defined previously, a *join point* ~~to be is~~ the node where two branches come together and a *split point* ~~to be is~~ the node where a single branch splits into multiple branches. We note that flipping the perspective of movement from downwards to upwards changes a *split point* into a *join point* and vice versa. This is an important observation since we did not record the vertical orientation of the samples during cutting. Using this terminology, we use techniques from network theory to topologically characterize the brine network, gaining further insight into the ~~complex~~ connectivity and implications for permeability.

In the analysis below, we ~~will examine several metrics that~~ use several metrics to describe the topology of the brine network ~~and are important for~~ that have important fluid flow implications. ~~For example, we~~ We first look at the throat sizes of the brine channels to gain an insight into the quantity of fluid that can move through different regions of a given brine channel. We then look at specific branches, both in terms of the number of branches and the size of each branch to learn more about the specific ~~pathway~~ pathways available for fluid movement. As part of this analysis, we ~~will investigate whether~~ incorporate our various transition probabilities to understand how the likelihood of a given branch to split into multiple branches ~~is dependent~~ depends upon the throat size of the parent branch. Finally, we will examine the size distribution of particular paths, looking for “pinch points” that may restrict flow and large regions that can provide ~~maximize~~ maximum flow through the network. Together, these metrics will provide a detailed description of the micro-scale complexity of the brine network.

## 4.2 Throat sizes of channels and branches

For each brine channel we calculated the average throat size  $\{\bar{r}_{z_i}\}$   $\{\bar{r}_i\}$  for all nodes  $\{p_{z_i}\}$   $\{p_{sij}\}$  at a given depth in the sample. Fig. 4 and Fig. 5 show the collection of these throat sizes for the five largest (by vertical extent) brine channels at each depth for the Butter Point and Iceberg Site cores, respectively. We note that since the entire length of the cores were not scanned, there is no correlation between the five brine channels selected from one subsample (e.g. 20-cm depth) to the next (e.g. 30-cm depth). There were 6 brine channels in each core that connected from the top to the bottom of ~~the sample~~ their respective subsample, with the majority of these channels found in ~~samples~~ subsamples from the top of each core. Generally speaking, the lengths of the vertical extent of the longest channel decreased with depth from the top of each core to around 60 cm, increased from 60 cm to roughly 120 cm, and then decreased from 120 cm to the bottom of the core. The trend between the top of the core and roughly 120 cm is consistent with what we would expect due to brine volume fraction, temperature, and the expected c-shape profile. The channels from the lower depths, which had even warmer temperatures, did not reach in-situ temperatures during scanning as described previously. We also note that both the lengths of the vertical extent and average throat size quickly diminished for channels beyond the few largest ones, as can be seen in the bottom panel of Fig. 4 and Fig. 5. Thus, we learn that fluid flow is most controlled by the behavior of the largest brine channel for a given section of sea ice.

The number of branches for a particular brine channel has potentially significant implications for fluid flow and permeability, such as influencing the rate at which chemical species may pass through the sea ice (Santiago et al., 2014; Yang et al., 1995; Newman, 2011). By increasing the number of branches, split points can increase the number of potential paths through the sample. A higher number of paths increases the probability of finding a path connecting the top and bottom of a sample,



thereby crossing the percolation threshold (Sahimi, 2011). Alternatively, split points can represent bottle-necks if the resulting child branches have smaller throat sizes than the parent throat, measured either as a minimum or as an aggregate. ~~In each two-dimensional horizontal slice, we defined a node for each two-dimensional connected component. Each two-dimensional connected component corresponds to a distinct branch of the brine channel, and thus, the number of branches at a given depth (i.e. particular horizontal slice) equals the number of nodes at this depth. Fig. ?? shows the total number of nodes per depth for the 15 largest (by vertical extent) brine channels in the~~ We observed that the largest channel in a cubic sample had by far the largest number of branches, with the quantity dependent upon the ice type. For example, in a columnar ice sample (70-cm sample depth) of the Butter Point core. ~~The ice core) the largest channel had by far the largest number of branches, with a maximum of 20 branches at a depth of 2.1 mm from the bottom of given depth within the sample. Since this sample was from the columnar ice region, the maximum number of branches is relatively small.~~ For comparison, the maximum number of branches for a sample in the frazil ice region at the top of the core was 124 nodes at a single depth. As expected, we find that brine channels in frazil ice have many more branches than brine channels in columnar ice, providing more distinct pathways for brine to move through the sample.

To gain insight into the behaviour of a channel, we visualized the number of branches and distribution of throat sizes by plotting the throat size  $r_i$  of each node  $p_i$  for the largest brine channel. Fig. 6 and Fig. 7 shows the throat sizes as a function of depth in the sample for three different representative sample depths: top, middle, and bottom of the Butter Point and Iceberg Site cores, respectively. For each channel shown, there is a plot of  $\{r_i\}$  at each depth ~~unsorted and a sorted by physical location in a two-dimensional grid (working line by line), not by size.~~ A second corresponding plot ~~shows node sizes~~ sorted by descending  $\{r_i\}$  for a given depth in ~~sample~~the channel. The first plots illustrate the connectivity of given branches, while the second plots provide a visualization of the distribution of  $r_i$ . The sample taken from the top of each core is from a region of frazil ice, which we would expect to have brine channels that are not well connected and have a distribution of throat sizes independent of depth in the sample. In both Fig. 6 and Fig. 7, panel ~~a shows that the brine network for this top-most sample was indeed not well connected, while panel b~~ (a) confirms this while panel (b) shows that there was an even distribution of throat sizes. The two plots for mid-depth networks (70 cm) are quite similar, illustrating less tortuosity and easier ability to track particular branches in the brine channel. The bottom sample of the Iceberg Site core had much larger throat sizes, although this sample was an anomaly in Fig. 2 and Fig. ???. We did not observe a direct correlation between the number of branches and the throat size of those branches, as the distribution of throat sizes appeared to be more dependent upon the particular depth of the sample in the ice core, and consequently, the ice type of that sample. From this analysis, we learn that although there may be more branches for a given brine channel in frazil ice, the branches have better vertical connectivity in columnar ice. This means that fluid can more readily move upwards or downwards through the larger well-connected brine channels in columnar ice.

### 4.3 Probability distribution of branching nodes

Next we examined the branching of particular nodes to understand the behavior of particular fluid flow paths. Following a branch of a channel downwards, at an individual node the branch may end, continue onwards, or split into multiple branches. Conversely, by looking upwards, a node can be considered to be the first in a new branch, the continuation of a branch, or the

joining point of multiple branches. Thus, for each node in a brine channel, we can tally-count the number of edges above and below said node (incoming) and below (outgoing) to determine the degree of splitting or joining of branches in the channel (Newman, 2011). The large majority of nodes do not display branching, and the number of two-way splits/joins was roughly the same as the number of times a branch started/ended. We observed decay for-in frequency with increasing quantity of splits/joins. The Iceberg Site core had a larger number of higher order branching with a significant number of 7-way or 8-way splits/joins. A branch that splits is most likely to split into only two child branches, and thus for example, a contaminant introduced at a point source is likely restricted to a small horizontal region, following only a few separate paths through the ice. When a split occurred, we compared  $r_i$  for the parent node to the collection of  $r_i$  for the children nodes with similar behavior observed in both cores. 84% of the time for the Butter Point core and 86% of the time for the Iceberg Site, the sum of the throat sizes for the children node were greater than that of the parent node. However, the parent node was still larger than the largest child node 67% of the time for the Butter Point core and 68% of the time for the Iceberg site core. Thus, we learn that larger brine channels are more likely to split than smaller channels, and after the split, the fluid can access a larger region of the sea ice.

With knowledge of the total number of split points and join points, we then investigated the likelihood that branching was dependent upon the throat size. Fig. 8 shows the probability distributions for pockets dying, remaining, joining, and splitting for two regions of each of four samples, frazil ice and columnar ice. Note that for these plots, we used two additional first-year sea ice cores from previous work in addition to the Butter Point and Iceberg Site cores (Lieb-Lappen et al., 2017). The most basic difference between the two regions is that larger pocket sizes do not appear in columnar ice. However, for ranges of  $r$  occurring in both regions, the shapes of the plots are similar. While small pockets can disappear, larger ones generally do not – the probabilities tend to zero (as marked by arrows in the plots in the first column). For pockets that remain but do not split or join with others, smaller pockets remain with lower probability (because more of them vanish) but then the probabilities follow an inverted parabolic trajectory, peaking around  $r = 130 \mu m$ . An interesting difference appears as throat size grows. In columnar ice, for throat size around  $r = 500 \mu m$ , we see two distinct behaviors. Some sizes remain with probability one (indicated by the top arrow in the second plot of the second row), while others remain with probability zero (bottom arrow). For the latter, looking at the last plot in the bottom row, we see these pockets are splitting into two or more pockets (indicated by the top arrow in that plot). This gives a signature for columnar ice – most brine channels simply continue on with slightly varying throat size but the ones that change generally split, creating a fork in the channel.

In frazil ice, the story for pockets which vanish is the same, as throat sizes become larger, they do not vanish in the next level. For remaining, splitting, and joining, however, there are new wrinkles in frazil ice relative to columnar ice. For pockets that remain, for larger throat sizes we see three types of behavior, two of which are similar to the behaviors in columnar ice (indicated by the top and bottom arrows of the second plot in the first row). But, a third behavior, where fifty percent of pockets remain, is new for frazil ice (middle arrow). This new behavior is echoed in the probabilities of splitting and joining (indicated by the middle arrows in those plots) which shows that in this regime, brine channels have a complex behavior, remaining, splitting, and joining with high frequency. This third category of behavior for large throat sizes is a signature of frazil ice.

In addition, we summed the total number of edges leaving (splits) and entering (joins) each node over all nodes for the five largest brine channels of each sample. Fig. 9 plots these raw counts and the difference between the two are given for the Butter Point and Iceberg Site cores. When we consider split points and join points separately, we are considering the network as a graph with directed edges. The difference between the number of splits and ~~the number of~~ joins (i.e. difference between number of incoming and outgoing edges) is a metric for the topological complexity of a network (Newman, 2011). The raw counts for number of splits and joins both had roughly a c-shape profiles for both cores, with largest values and variability observed towards the bottom of the core. This is to be expected because the warmer part of the core allows for greater interconnectivity of branches in the brine network. For all brine channels, the number of splits was quite similar to the number of joins, and hence the differences between the two were quite small. However, there was still a general c-shape profile between 0 cm and 140 cm, indicating that topological complexity is greatest near the top and bottom of the core. This is consistent with frazil ice in the top of the core and increased branching in the warmer ice. Interestingly, both cores showed a decrease in topological complexity for the lowest samples below 140 cm. This could either be an artifact of not achieving actual in-situ temperatures with the cooling stage, or potentially an indication of a thought-provoking trend. If samples were not reaching in-situ temperatures, isolated channels may not have rejoined upon warming from storage temperatures, thereby reducing the number of split points and join points. Alternatively, a possible explanation of a real trend could be that as brine channels widen for the warmest samples, branches join together, reducing the topological complexity. A consequence of reducing the number of branches is a reduction in the number of split points and join points.

#### 4.4 Capacity for fluid flow

We next examined the fluid flow capacity of each channel by both summing the number of pixels associated with all nodes for each channel and summing the total throat sizes of all nodes in each channel. We note that this represents a region larger than the pathways used for current fluid flow since many branches do not connect the top of a sample to the bottom. However, when the ice begins to warm and the branches become more interconnected, the process will likely start from the existing regions containing brine. Thus, this metric offers a starting place for comparing the capacity for fluid flow across different samples. Fig. 10 shows cumulative distribution functions for the number of brine channels as functions of the total number of pixels in the channel, with each line represents a different sample depth. The lines are colored on a gradient from red representing the top of the core to blue for the bottom of the core. The distribution functions for all depths on both cores were remarkably similar, and pairwise Kolmogorov-Smirnov tests did not detect that any two curves were from different probability distributions ( $p \geq 0.1$ ) (Massey, 1951; Graham and Hogg, 1978). Both cores did show a trend of increased probability of brine channels with more pixels occurring at shallower depths, with a more robust trend observed in the Iceberg Site core. This trend could be due to samples at lower depths having an increased number of isolated small channels that have yet to connect to larger channels. Since there is doubt as to whether the samples below 120 cm were scanned at their in-situ temperatures, perhaps these small isolated channels would have connected to larger channels under warmer conditions. Fig. 11 presents similar cumulative distribution functions for the number of brine channels as functions of the summed throat size of all nodes in the channel. The curves yield the same observations as before, with the Iceberg Site core again having a stronger correlation of

increased probability of larger channels occurring at shallower depths. Likewise, Kolmogorov-Smirnov tests did not detect any two curves representing different probability distributions ( $p \geq 0.1$ ). Any noticeable changes to the relative shape of the curves represent disproportionate changes in the shape of the brine channel with size of the channel, however, these variations were quite minor. In general, the shape of the curves in Fig. 11 are similar to those in Fig. 10. Thus, we conclude that brine channels in samples near the top of the core provide fluid with multiple distinct pathways to move through the sample, while deeper in the core there are only a few large channels with many small isolated paths that may connect under warmer ice conditions.

#### 4.5 Following individual fluid flow paths

To further assess fluid flow capabilities, we analyzed individual branches of brine channels to isolate particular paths through the network. By construction, moving from  $p_i$  to  $p_j$  along an edge must either increase or decrease the height in the sample by one step ( $15 \mu\text{m}$ ). First, we ~~treated the network as a directed graph and considered~~ allowed only downward flow along the edges, considering paths starting from the first node. Since the network does not allow lateral movement, each step along an edge corresponds to a  $15 \mu\text{m}$  step downwards. Although previously 6 brine channels were found that connected the top to the bottom of a given sample, no such paths were found in the directed graphs. This is because all paths connecting the top to the bottom of a sample required some movement upwards along a branch in order to reach the bottom. Fig. 12 shows an example of a brine channel where although the network is connected, any connecting path involves both upward and downward flow, such as the path highlighted in red. Thus, we selected the longest downward directed path from each brine channel, as well as any additional paths of the same length. This mimics a natural process such as gravity drainage, allowing us to study its influence on brine movement in the absence of pressure forces that aid upwards transport. Summing over all brine channels in the Butter Point core resulted in 63 763 directed paths. From this collection, we could selected the 15 316 paths of length 50 steps ( $750 \mu\text{m}$ ) for statistical analysis of minimum throat size ( $r^{min}$ ), maximum throat size ( $r^{max}$ ), and summed throat size. Future work will ~~enable us to use~~ this model to statistically recreate brine channels that have this same statistical distribution of brine channel sizes.

We completed a similar analysis on the brine channel network, however this time ~~treating it as an undirected graph with~~ bidirectional edges. To avoid complexities arising from cycles (repeating loops) allowing for both upward and downward flow. Allowing for upward flow can present a challenge in tracking various pathways if there is a repeating loop. Thus, we only considered ~~different spanning trees (paths that reached every node but have no cycles)~~ had no loops. In the language of networks, we avoided complexities arising from cycles by only considering different spanning trees. We used a depth-first search algorithm to find all paths reaching the maximum vertical extent of each channel (West, 2001; Newman, 2011). We checked results through comparison of the distance obtained using Dijkstra's algorithm for finding the shortest-path tree (West, 2001; Dijkstra, 1959). This resulted in 36 449 paths over all the brine channels in the Butter Point core, of which 1753 were of length 50 steps ( $750 \mu\text{m}$ ). We note that we can use the adjacency matrix to calculate the number of different walks (paths including cycles) that connected the top and bottom of a sample (West, 2001). However, due to the size of the adjacency matrix, this became computationally too expensive for large brine channels.

35 We used the 1753 paths of length  $> 50$  steps to develop probability distributions for basic network statistics important for fluid flow such as  $r^{min}$ ,  $r^{max}$ , and summed throat size of the path. These statistics can yield valuable information regarding the location and distribution of “pinch points,” large channels, and total fluid flow through a brine channel. First, the paths were split into 3 categories based upon the ending node ( $p_f$ ) throat size:  $r_f < 1500 \mu\text{m}$ ,  $1500 \leq r_f < 5250 \mu\text{m}$ , and  $r_f \geq 5250 \mu\text{m}$ . Then, we split each category into 3 ~~sub-categories~~ groups based upon the throat size of the starting node ( $p_1$ ) ~~throat size~~,  
5 using bins of the same size ( $r_1 < 1500 \mu\text{m}$ ,  $1500 \leq r_1 < 5250 \mu\text{m}$ , and  $r_1 \geq 5250 \mu\text{m}$ ). This division resulted in splitting the paths into 9 separate sub-categories. For each sub-category, we calculated the probability distributions for  $r^{min}$ ,  $r^{max}$ , and summed throat size of the path and we present these histograms in Fig. 13. All plots are color-coded by  $r_1$ , with red, blue, and green histograms representing small, medium, and large throats, respectively. All histograms show the similar trend that both  $r_1$  and  $r_f$  have a strong influence on resulting metrics, with larger  $r_1$  and/or  $r_f$  having larger  $r^{min}$ ,  $r^{max}$ , and total volumes.  
10  $r_f$  had slightly more of an impact, particularly on  $r^{min}$ . There were no clear general trends in regards to the shape of the distributions. However, we note that for the smallest  $r_f$ , all three histograms for  $r^{min}$  had a large peak around  $30 \mu\text{m}$  (Fig. 13, top row. This peak corresponds to the smallest measurable branches, and we could potentially remove these paths from current fluid flow analysis. However, as the ice begins to warm, these “pinch points” are likely to have a significant impact on crossing percolation thresholds.

## 15 5 Conclusions

The primary objective of this manuscript was to characterize the brine channel topology, morphology, and connectivity, thereby providing the statistical framework that we can use to create a sea ice brine channel network model. Since there was roughly a linear ~~correlation~~ relationship between sample temperature and depth in the ice core, trends observed with one variable could easily be converted to the other. Here we have presented quantitative metrics of the brine channel topological complexity,  
20 degree of connectivity, average and individual throat sizes, probability distributions for branches to split and join, capacity for fluid flow. The probability distributions shown represent a sampling of the various ~~possibilities~~ microstructural behaviours needed to statistically create a brine channel network parametrized by depth and temperature.

Overall, we observed similar profiles for both first-year sea ice cores. Both cores had the expected c-shape profile for throat sizes. Topological complexity also had a similar c-shape profile that is consistent with complex frazil ice in the top of the core, relatively cold columnar ice below it, and increasingly warmer columnar ice at lower depths. We did not have good success  
25 in imaging and thresholding platelet ice as we were not able to reach the warmest in-situ temperatures at the bottom of the core. We observed more branching in frazil ice than columnar ice, but better vertical connectivity in the columnar ice and thus better capacity for fluid flow. By analyzing probability distributions for branching, we developed characteristic signatures for each ice type. For columnar ice, most brine channels simply continue downwards with little change in throat size. However, for  
30 channels in which there is a significant change in throat size, there is a likely fork leading to a split in the channel. Meanwhile, large channels in frazil ice will split, join, and remain, all with relatively high frequencies. Columnar ice had fewer, but larger, channels that showed increased connectivity with warmer ice at lower depths.

When examining the branching in brine channels, we observed that the largest channels had the greatest number of branches, but overall the throat size did not appear to have a direct correlation with the number of branches. Throat sizes were most dependent upon the depth and consequently ice type. When a split in a brine channel does occur, it is most likely to split into two child branches, and after the split, the brine generally has access to a larger region of the sea ice than before. Starting and ending throat sizes are strongly correlated with the flow capacity with larger initial/final throat sizes strongly indicative of increased flow. We detected pinch points in the brine channels that are critical points when determining whether the sea ice cover has crossed the percolation threshold. However, further work is needed in examining warmer ice with greater brine volume fractions.

The next step for this work is to create a brine channel network from the statistics presented here. For a sample at a given depth/temperature, first an initial set of nodes at the top height would be selected, where the nodes have throat sizes consistent with the probability distributions shown here. Branches could grow or shrink, split into multiple branches, join with other branches, remain constant, or stop, all with probabilities dependent upon the given node throat size, depth/temperature, and proximity to other nodes. The model described herein can help address questions such as how microstructural changes may be path dependent (e.g., whether to consider both upwards and downwards flow), how fluid flow may vary with depth, and what are the percolation implications of temperature fluctuations in an ice core. In summary, we successfully developed a method using  $\mu$ CT imaging to characterize the geometry of brine channels, whereby we can parameterize the pore networks using topological techniques that can be adjusted for depth and temperature, correlated with physical properties, and used in dynamical models of sea ice.

*Acknowledgements.* This research was supported by US National Science Foundation (NSF) grant PLR-1304134. The views and conclusions contained herein are those of the authors and should not be interpreted as representing official policies, either expressed or implied, of the NSF or the United States Government.

## References

- Berkowitz, B. and Balberg, I.: Percolation Approach to the Problem of Hydraulic Conductivity in Porous Media, *Transport Porous Med.*, 9, 275–286, 1992.
- 15 Cox, G. F. N. and Weeks, W. F.: Brine Drainage and Initial Salt Entrapment in Sodium Chloride Ice, Tech. Rep. Research Report 345, CRREL, Hanover, NH, 1975.
- Cox, G. F. N. and Weeks, W. F.: Equations for Determining the Gas and Brine Volumes In Sea-Ice Samples, *J. Glaciol.*, 29, 306–316, 1983.
- Delerue, J. F., Perrier, E., Timmerman, A., and Swennen, R.: 3D Soil Image Characterization Applied to Hydraulic Properties Computation, in: *Applications of X-ray Computed Tomography in the Geosciences*, edited by Mees, F., Swennen, R., Van Geet, M., and Jacobs, P., vol. 215, pp. 167–175, Geological Society Special Publications, London, 2003.
- 20 Dijkstra, E. W.: A Note on Two Problems in Connexion with Graphs, *Numer. Math.*, 1, 269–271, 1959.
- Dong, H., Fjeldstad, S., Alberts, L., Roth, S., Bakke, S., and Øren, P.-E.: Pore Network Modelling on Carbonate: A Comparative Study of Different Micro-CT Network Extraction Methods, in: *Soc. Core Anal. Int. Symp.*, UAE, 2008.
- Dwyer, R. A.: Maximal and Minimal Balls, *Comp. Geom.*, 3, 261–275, 1993.
- 25 Fatt, I.: The Network Model of Porous Media, *Trans. Am. Inst. Min. Metal. Petrol. Eng.*, 207, 144–181, 1956.
- Frankenstein, G. and Garner, R.: Equations for Determining the Brine Volume of Sea Ice from  $-0.5\text{ C}$  to  $-22.9\text{ C}$ , *J. Glaciol.*, 6, 943–944, 1967.
- Freitag, J.: Untersuchungen zur Hydrologie des arktischen Meereises – Konsequenzen für den kleinskaligen Stofftransport., *Ber. Polarforsch/Rep. Pol. Res.*, 325, 1999.
- 30 Golden, K. M.: Percolation Models for Porous Media, in: *Homogenization and Porous Media*, edited by Hornung, U., pp. 27–43, Springer-Verlag, Berlin, Germany, 1997.
- Golden, K. M., Ackley, S. F., and Lytle, V. I.: The Percolation Phase Transition in Sea Ice, *Science*, 282, 2238–2241, 1998.
- Golden, K. M., Eicken, H., Heaton, A. L., Miner, J., Pringle, D. J., and Zhu, J.: Thermal Evolution of Permeability and Microstructure in Sea Ice, *Geophys. Res. Lett.*, 34, 2007.
- 35 Graham, J. E. and Hogg, R. V.: *Studies in Statistics*, Mathematical Association of America, Washington D. C., 1978.
- Heijmans, H. J. A. M. and Roerdink, J. B. T. M.: *Mathematical Morphology and its Applications to Image and Signal Processing*, Kluwer Academic Publishers, Dordrecht, Netherlands, 1998.
- Lieb-Lappen, R. M. and Obbard, R. W.: The Role of Blowing Snow in the Activation of Bromine over First-Year Antarctic Sea Ice, *Atmos. Chem. Phys.*, 15, 7537–7545, 2015.
- Lieb-Lappen, R. M., Golden, E. J., and Obbard, R. W.: Metrics for interpreting the microstructure of sea ice using X-ray micro-computed tomography, *Cold Reg. Sci. Technol.*, 138, 24–35, <https://doi.org/10.1016/j.coldregions.2017.03.001>, 2017.
- 5 Massey, F. J.: The Kolmogorov-Smirnov Test for Goodness of Fit, *J. Am. Stat. Assoc.*, 46, 68–78, 1951.
- Nakawo, M. and Sinha, N. K.: A Note on Brine Layer Spacing of First-Year Sea Ice, *Atmos. Ocean*, 22, 193–206, 1984.
- Newman, M. E. J.: *Networks: An Introduction*, Oxford University Press, New York, 2011.
- Obbard, R. W., Lieb-Lappen, R. M., Nordick, K. V., Golden, E. J., Leonard, J. R., Lanzirotti, A., and Newville, M. G.: Synchrotron X-ray Fluorescence Spectroscopy of Salts in Natural Sea Ice, *Earth Space Sci.*, 3, <https://doi.org/10.1002/2016EA000172>, 2016.
- 10 Petrich, C., Langhorne, P. J., and Sun, Z. F.: Modelling the Interrelationships Between Permeability, Effective Porosity and Total Porosity in Sea Ice, *Cold Reg. Sci. Technol.*, 44, 131–144, 2006.

- Pierret, A., Capowiez, Y., Belzunces, L., and Moran, C. J.: 3D Reconstruction and Quantification of Macropores using X-Ray Computed Tomography and Image Analysis, *Geoderma*, 106, 247–271, 2002.
- Pringle, D. J., Miner, J. E., Eicken, H., and Golden, K. M.: Pore Space Percolation in Sea Ice Single Crystals, *J. Geophys. Res.*, 114, 2009.
- 15 Sahimi, M.: *Flow and Transport in Porous Media and Fractured Rock*, Wiley-VCH, Weinheim, Germany, 2011.
- Santiago, E., Velasco-Hernández, J. X., and Romero-Salcedo, M.: A Methodology for the Characterization of Flow Conductivity through the Identification of Communities in Samples of Fractured Rocks, *Expert Syst. Appl.*, 41, 811–820, 2014.
- Silin, D. and Patzek, T.: Pore Space Morphology Analysis using Maximal Inscribed Spheres, *Physica A*, 371, 336–360, 2006.
- 490 Thomas, D. N. and Dieckmann, G. S.: *Sea Ice*, Wiley-Blackwell, Hoboken, NJ, 2009.
- Weeks, W. F. and Ackley, S. F.: *The Growth, Structure, and Properties of Sea Ice*, Tech. Rep. Monograph 82-1, CRREL, Hanover, NH, 1982.
- West, D. B.: *Introduction to Graph Theory*, Prentice Hall, Upper Saddle River, NJ, 2001.
- Yang, G., Myer, L. R., Brown, S. R., and Cook, N. G. W.: Microscopic Analysis of Macroscopic Transport Properties of Single Natural Fractures Using Graph Theory Algorithms, *Geophys. Res. Lett.*, 22, 1429–1432, 1995.
- 495 Zhu, J., Jabini, A., Golden, K. M., Eicken, H., and Morris, M.: A Network Model for Fluid Transport through Sea Ice, *Ann. Glaciol.*, 44, 129–133, 2006.

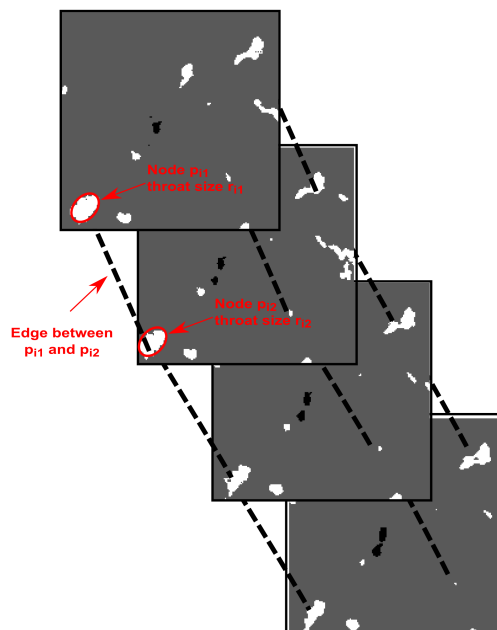

**Figure 1.** Sketch illustrating how the brine channel network is defined. Four horizontal two-dimensional slices are shown with lines connecting adjacent nodes (not all lines are drawn).

The degree of anisotropy, Euler number, and degree of connectivity of the brine channels for  $\mu$ CT scans at in-situ temperatures. The red squares and blue circles represent ice cores from Butter Point and Iceberg Site, respectively.



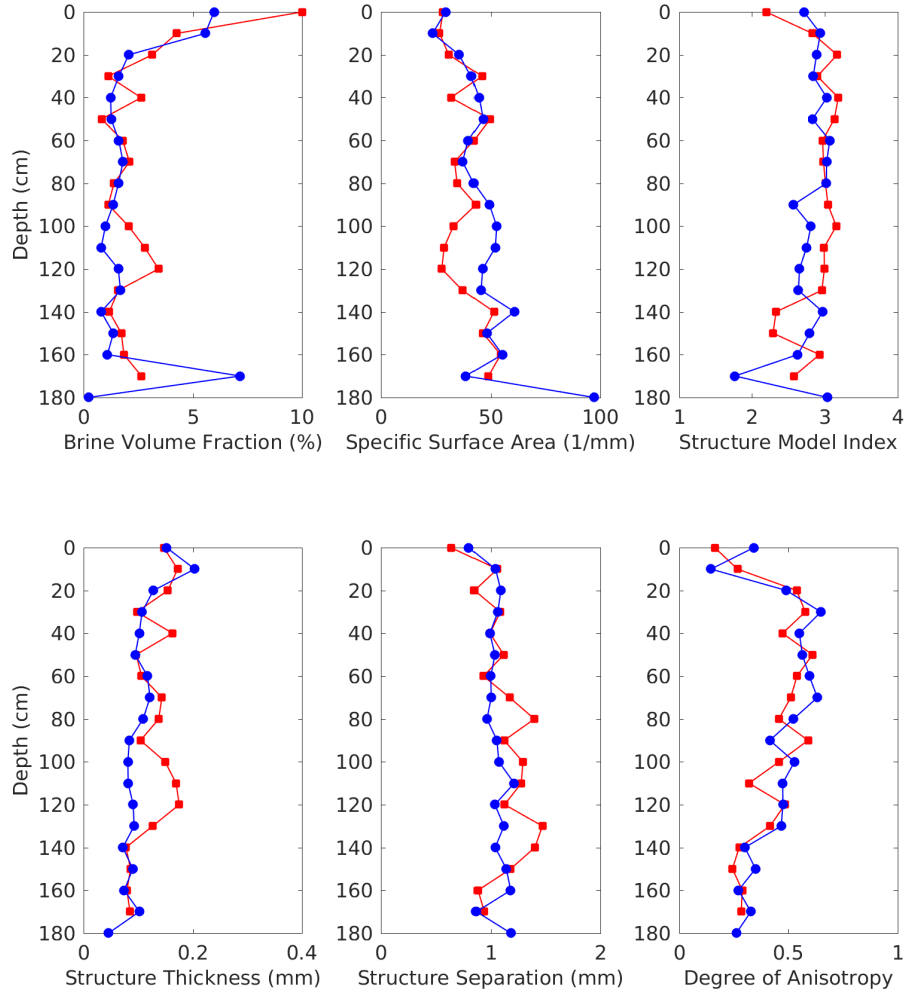

**Figure 2.** Definition and shape of brine channels scanned with a  $\mu$ CT scanner and a Peltier cooling stage set at in-situ temperatures. The red squares and blue circles represent ice cores from Butter Point and Iceberg Site, respectively.

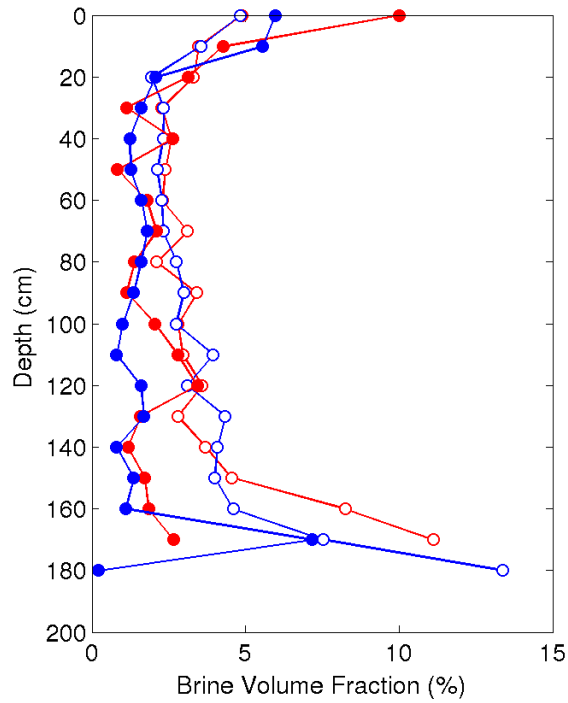

**Figure 3.** Comparing  $\mu$ CT-measured brine volume fraction to the expected values derived from the Frankenstein and Garner relationship (Frankenstein and Garner, 1967; Cox and Weeks, 1983). Results from the Butter Point (red) and Iceberg Site (blue) cores, where the  $\mu$ CT-measured values are the filled circles and the expected values are the open circles.

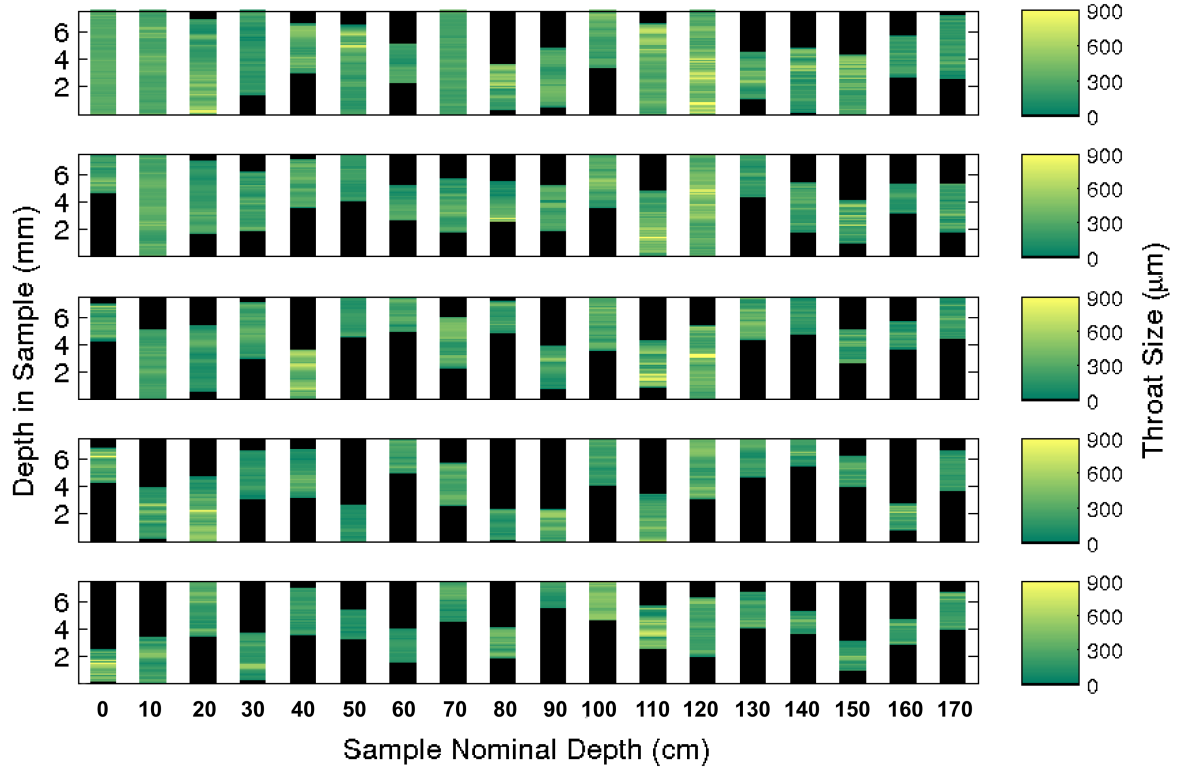

**Figure 4.** Average throat size  $\{\bar{r}_{z_i}\}$  for the five largest brine channels of each sample for the Butter Point ice core. For each channel, at a given depth we calculated the average throat size of all nodes and color-coded accordingly. Note that there are only 6 channels that connect the top to the bottom of the sample (at depths of 0, 10, 70, and 120 cm).

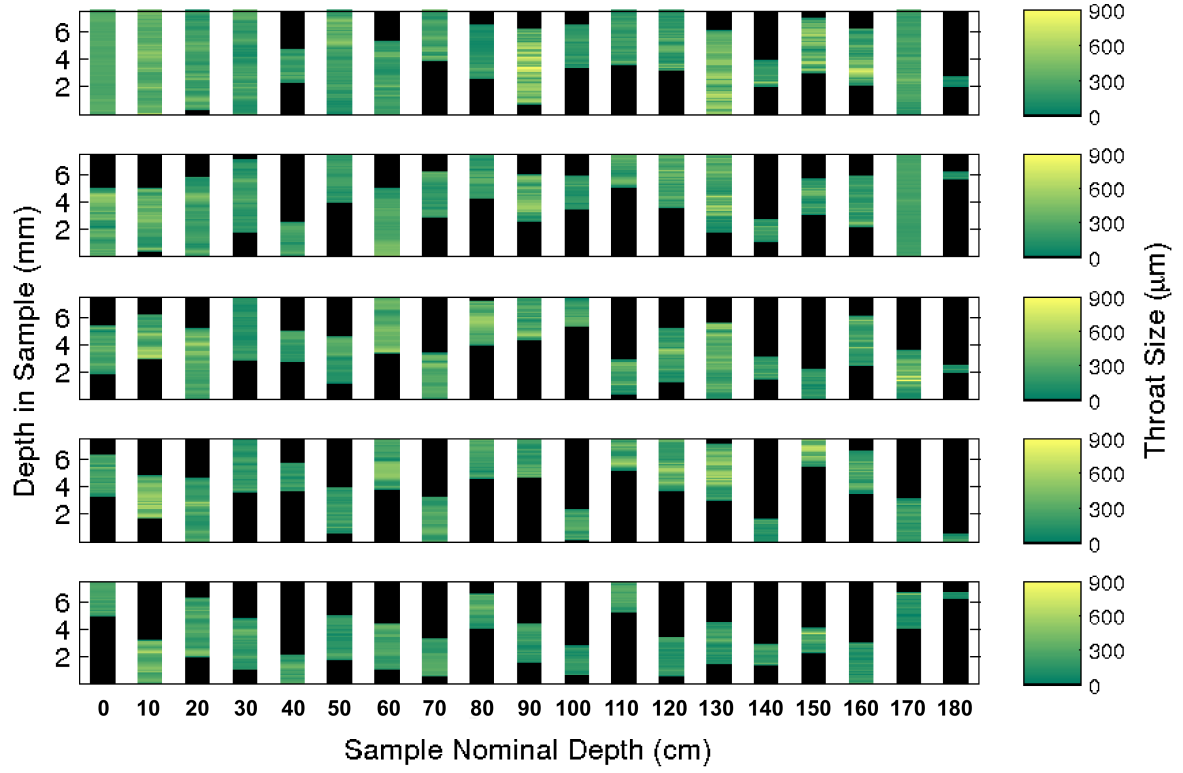

**Figure 5.** Average throat size  $\{\bar{r}_{z_i}\}$  for the five largest brine channels of each sample for the Iceberg Site ice core. For each channel, at a given depth we calculated the average throat size of all nodes and color-coded accordingly. Note that there are only 6 channels that connect the top to the bottom of the sample (at depths of 0, 10, 30, 50, and 170 cm).

Number of branches at each depth for the 15 largest brine channels in the 70-cm sample of the Butter Point core. We measured the number of branches by the number of nodes at a given depth in the sample. Each line represents a separate channel, and the horizontal extent illustrates the number of branches.

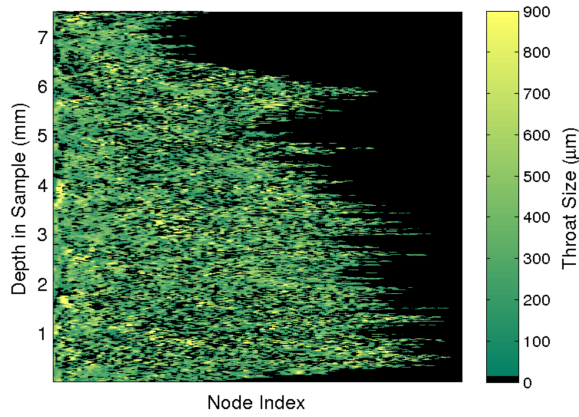

a) Depth 0 cm, unsorted

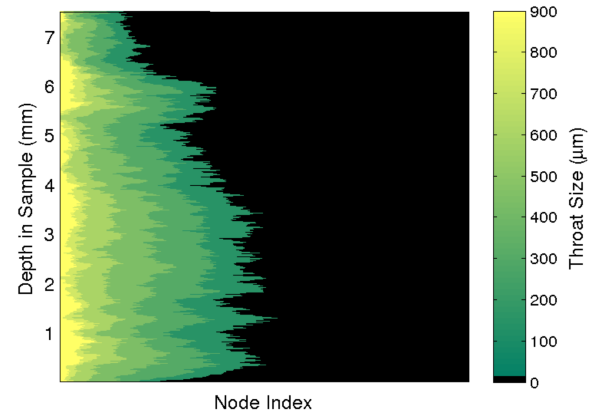

b) Depth 0 cm, sorted

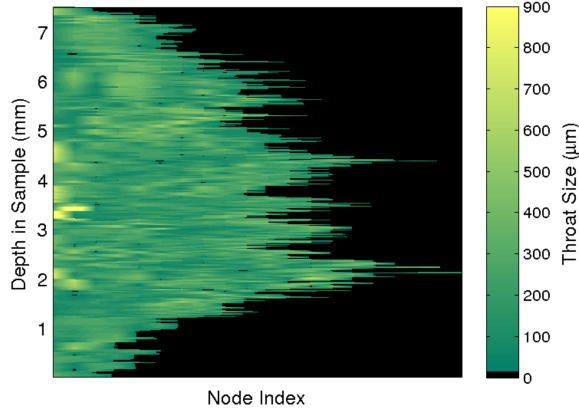

c) Depth 70 cm, unsorted

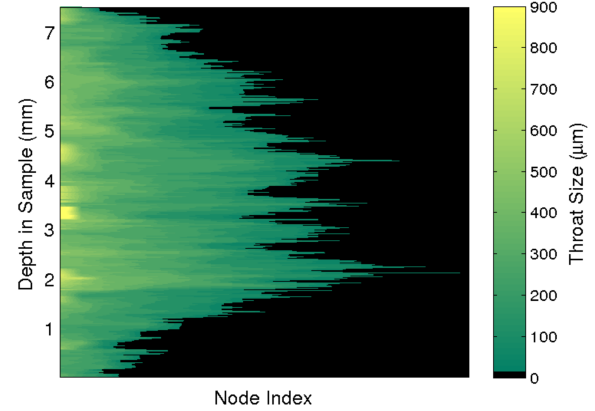

d) Depth 70 cm, sorted

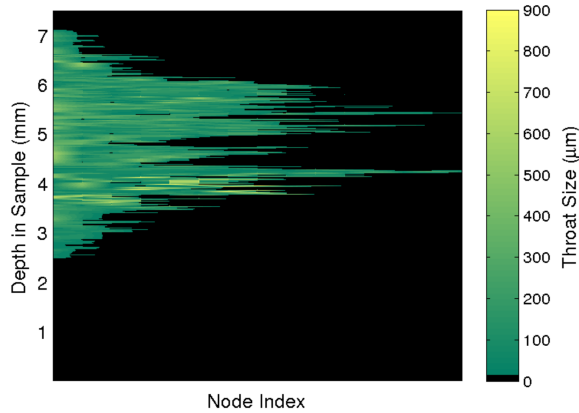

e) Depth 170 cm, unsorted

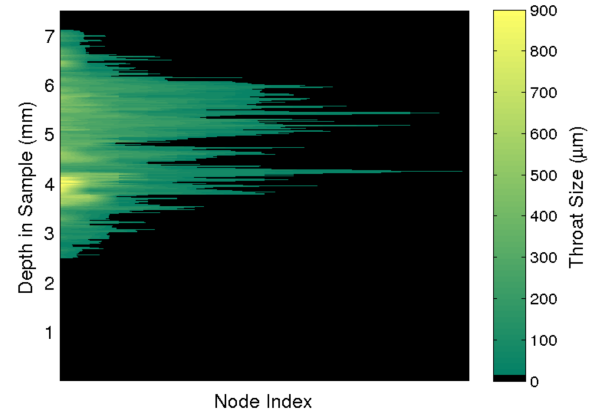

f) Depth 170 cm, sorted

**Figure 6.** Throat size  $r_i$  of each node for the largest channel of representative samples in the Butter Point core. The top, middle, and bottom rows show the largest brine channel from the sample at 0, 70, and 170 cm, respectively. The left panels show the throat sizes at each depth in the sample unsorted with nodes sorted by location, while the right panel sorts the nodes by throat sizes in descending order.

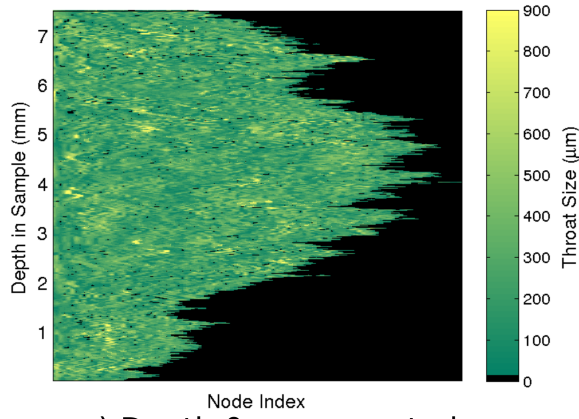

a) Depth 0 cm, unsorted

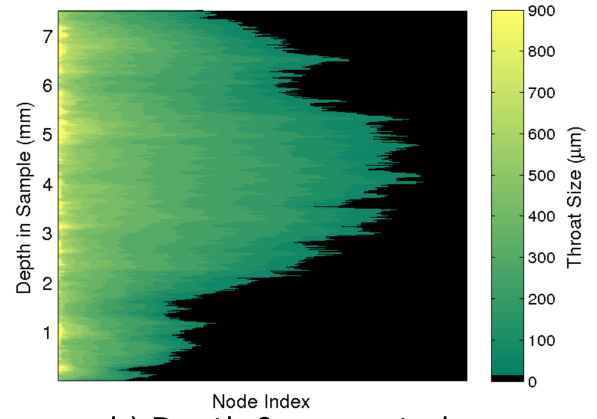

b) Depth 0 cm, sorted

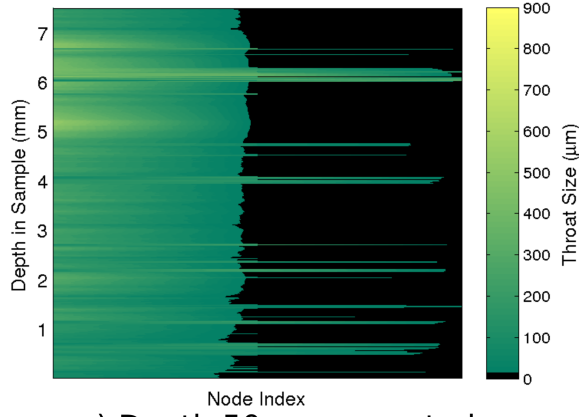

c) Depth 50 cm, unsorted

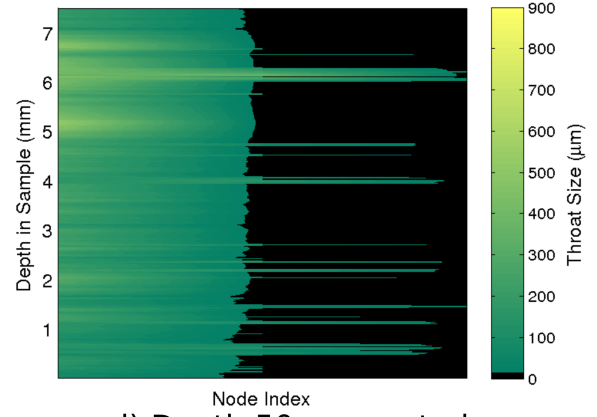

d) Depth 50 cm, sorted

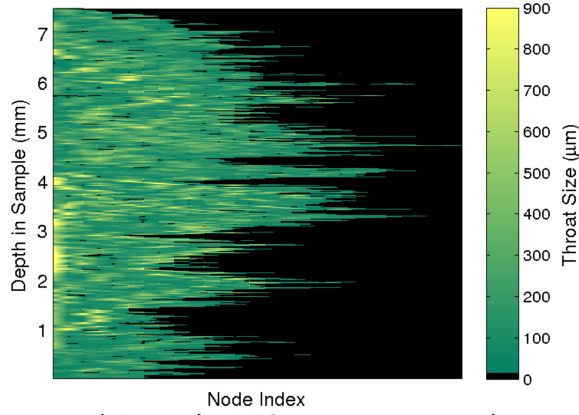

e) Depth 170 cm, unsorted

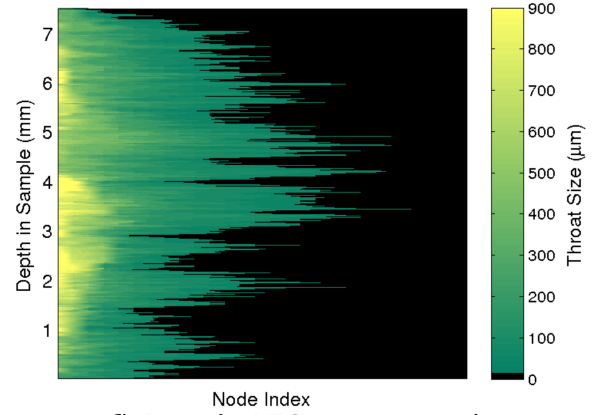

f) Depth 170 cm, sorted

**Figure 7.** Throat size  $r_i$  of each node for the largest channel of representative samples in the Iceberg Site core. The top, middle, and bottom rows show the largest brine channel from the sample at 0, 50, and 170 cm, respectively. The left panels show the throat sizes at each depth in the sample unsorted with nodes sorted by location, while the not by size. The right panel sorts the nodes by throat sizes-size in descending order.

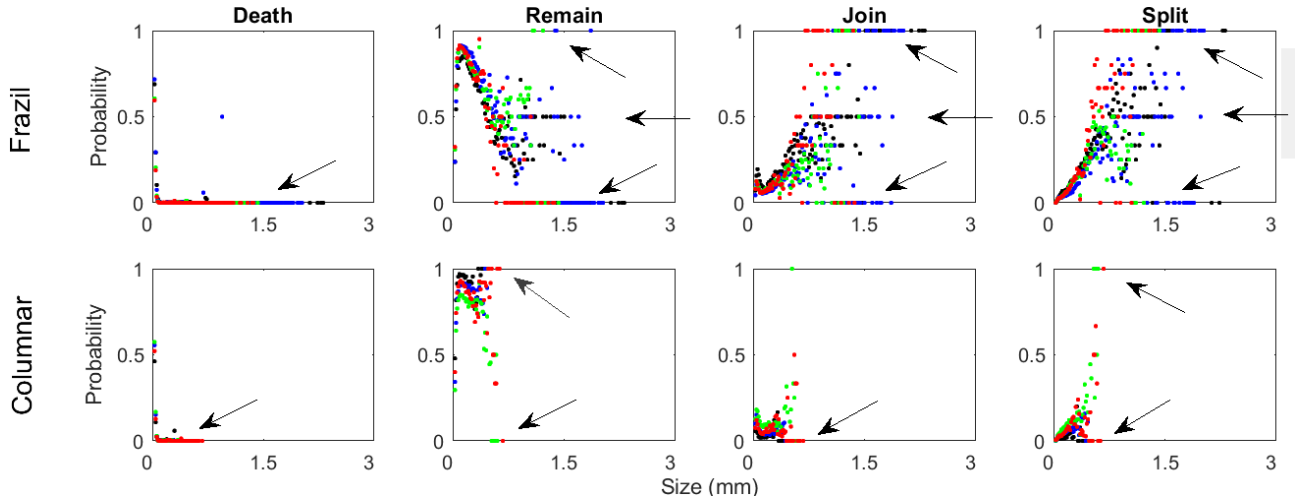

**Figure 8.**  $\{r_i\}$  probability distributions showing the likelihood a node dies, remains, splits, or joins as a function of the throat size  $r$ . The top four figures show probability distributions for frazil ice while the bottom four figures show probability distributions for columnar ice. Note that to complete these figures, in addition to the Butter Point and Iceberg Site cores, we used two additional first year sea ice cores from previous work (Lieb-Lappen et al., 2017). Butter Point is shown in black, Iceberg Site is shown in blue, and the two additional first year ice cores are shown in red and black.

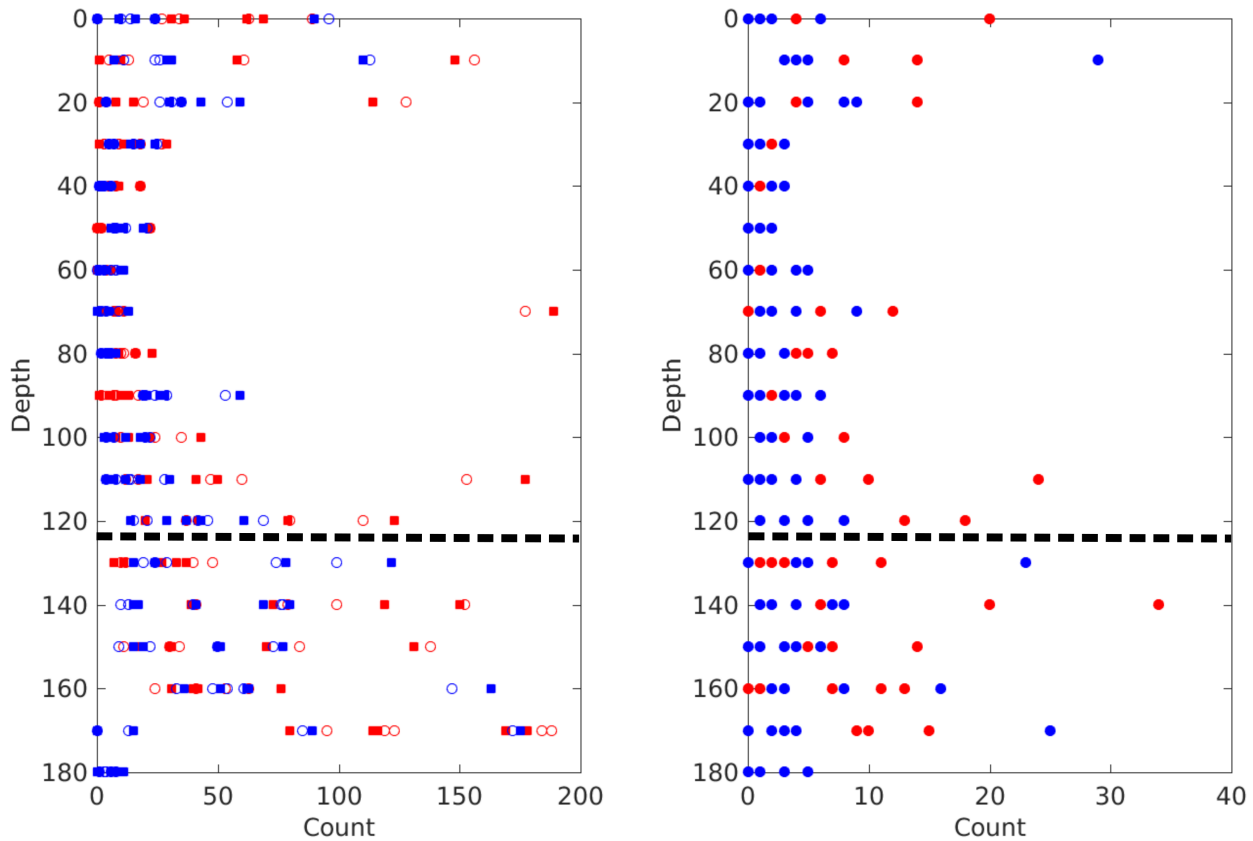

**Figure 9.** Topological complexity of the five largest brine channels in each sample for both the Butter Point (red) and Iceberg Site (blue) cores. The left panel shows the total number of splits (open circles) and joins (filled squares) over all nodes in a given channel. The right panel shows the absolute value of the difference between the number of splits and joins. The dashed line highlights the depth below which there is concern regarding the effectiveness of the cooling stage and whether samples were scanned at actual in-situ temperatures.



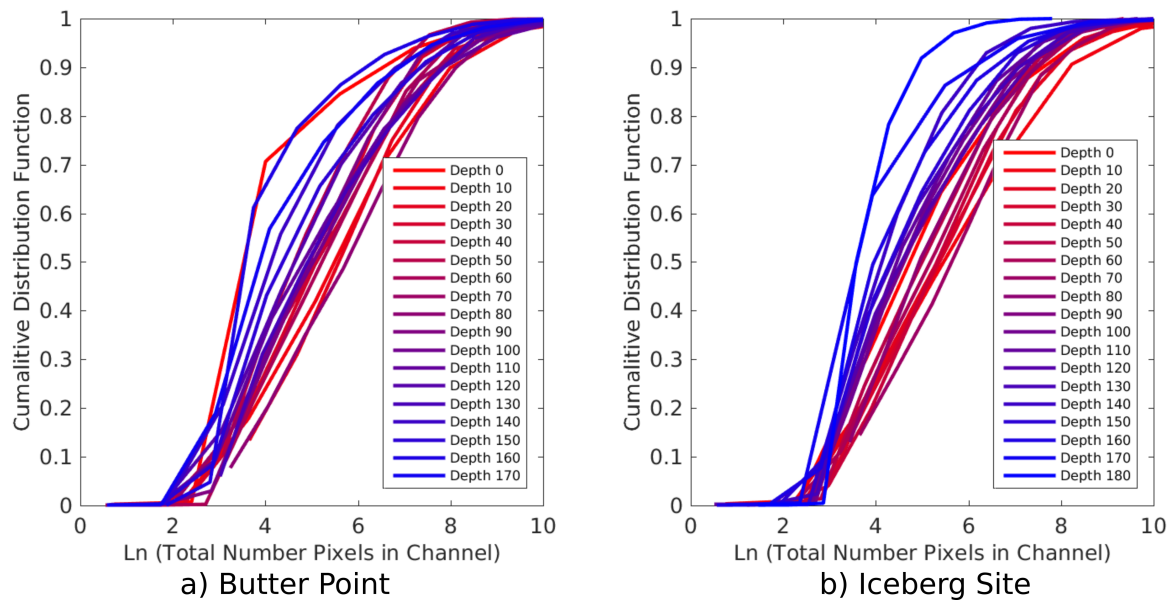

**Figure 10.** Cumulative distribution functions for number of brine channels as functions of the total number of pixels in the channel. The left and right panels are for the Butter Point and Iceberg Site ice cores, respectively. In both panels, each line represents a different sample depth where the lines are colored on a gradient from red representing the top of the core to blue for the bottom of the core. Note that pixels in the original  $\mu$ CT images are  $15\ \mu\text{m}$  on each edge.

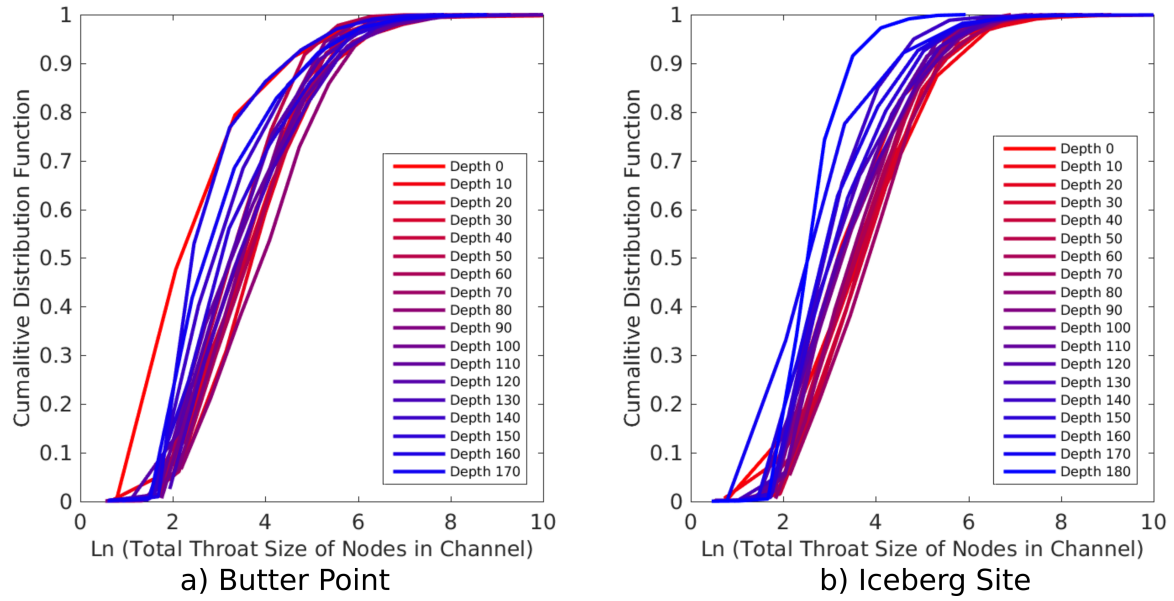

**Figure 11.** Cumulative distribution functions for number of brine channels as functions of the summed throat size of all nodes in the channel. The left and right panels are for the Butter Point and Iceberg Site ice cores, respectively. In both panels, each line represents a different sample depth where the lines are colored on a gradient from red representing the top of the core to blue for the bottom of the core. Note that throat sizes in the original  $\mu$ CT images are  $15\ \mu\text{m}$  on each edge.

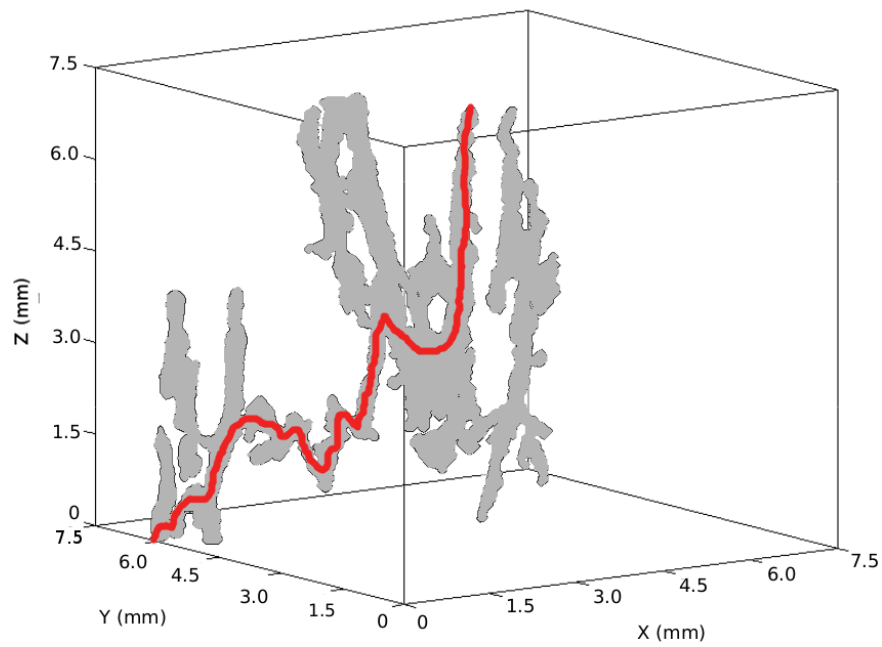

**Figure 12.** Largest brine channel at 70 cm in the Butter Point ice core. Although this brine channel connects from top to bottom, there is not a directed path that does so. Any connecting path involves movements both upwards and downwards. One such path is highlighted in red.

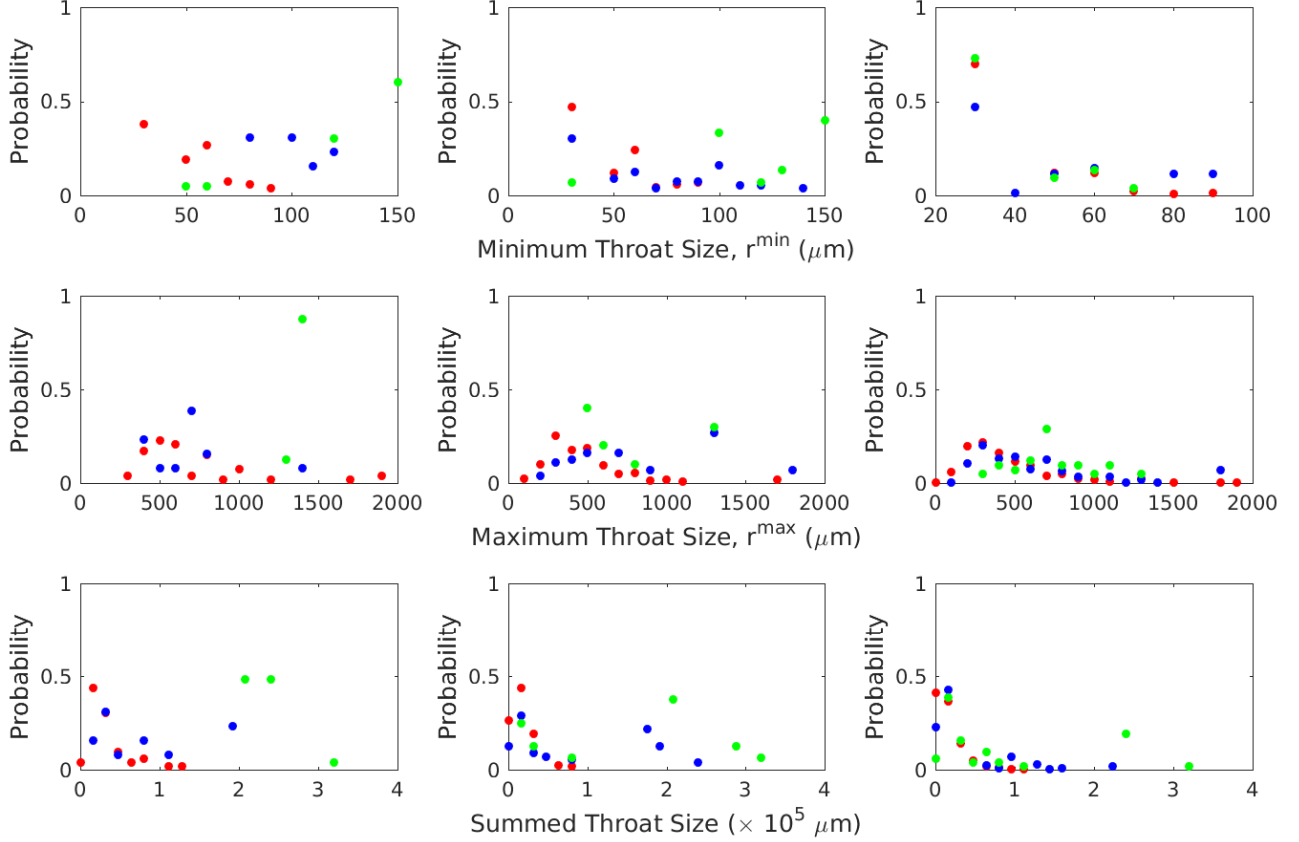

**Figure 13.** Probability distributions of paths connecting the top to the bottom for all brine channels in the Butter Point ice core. Only paths greater than 50 steps, or  $750 \mu\text{m}$  were considered. Left, middle, and right panels represent channels where  $r_f < 1500 \mu\text{m}$ ,  $1500 \leq r_f < 5250 \mu\text{m}$ , and  $r_f \geq 5250 \mu\text{m}$ , respectively. Top, middle, and bottom rows represent probability distributions for  $r^{\min}$ ,  $r^{\max}$ , and summed throat size, respectively. For all panels, the colors red, blue, and green represent channels where  $r_1 < 1500 \mu\text{m}$ ,  $1500 \leq r_1 < 5250 \mu\text{m}$ , and  $r_1 \geq 5250 \mu\text{m}$ , respectively.

# A Network Model for Characterizing Brine Channels in Sea Ice

Ross M. Lieblappen<sup>1,2</sup>, Deip D. Kumar<sup>3</sup>, Scott D. Pauls<sup>4</sup>, and Rachel W. Obbard<sup>1</sup>

<sup>1</sup>14 Engineering Drive, Thayer School of Engineering, Dartmouth College, Hanover, NH, USA

<sup>2</sup>124 Admin Drive, Vermont Technical College, Randolph Center, VT, USA

<sup>3</sup>6211 Sudikoff Lab, Department of Computer Science, Dartmouth College, Hanover, NH, USA

<sup>4</sup>27 N. Main Street, Department of Mathematics, Dartmouth College, Hanover, NH, USA

*Correspondence to:* Ross M. Lieblappen (Ross.Lieb-Lappen@vtc.vsc.edu)

**Abstract.** The brine pore space in sea ice can form complex connected structures whose geometry is critical in the governance of important physical transport processes between the ocean, sea ice, and surface. Recent advances in three-dimensional imaging using x-ray micro-computed tomography have enabled the visualization and quantification of the brine network morphology and variability. Using imaging of first-year sea ice samples at in-situ temperatures, we create a new mathematical network model to characterize the topology and connectivity of the brine channels. This model provides a statistical framework where we can characterize the pore networks via two parameters, depth and temperature, for use in dynamical sea ice models. Our approach advances the quantification of brine connectivity in sea ice, which can help investigations of bulk physical properties, such as fluid permeability, that are key in both global and regional sea ice models.

## 1 Introduction

The detailed microstructure of sea ice is critical in both governing the movement of fluid between the ocean and the sea ice surface and controlling processes such as ice growth and decay (Thomas and Dieckmann, 2009; Petrich et al., 2006). Its complex pore structure influences many of the bulk thermal and electric properties of sea ice. The permeability is of primary interest to a wide range of disciplines (e.g., biology and atmospheric chemistry) as it controls fluid flow through sea ice. The “Rule of Fives” provides a guideline for describing the percolation threshold in first-year columnar sea ice. Specifically, the ice becomes permeable to fluid transport at brine volume fractions greater than 5%, which are found in ice at about  $-5^{\circ}\text{C}$  with a salinity of about 5 parts per thousand (Golden et al., 1998). Although this rule of thumb is helpful in describing and modeling basic phenomenon, it does not fully capture the spatially and temporally evolving details of the sea ice microstructure. Here we provide a more topologically complete characterization of sea ice pore structure.

Previous research has recognized the importance of thermally activated percolation thresholds (e.g., Cox and Weeks, 1975; Weeks and Ackley, 1982; Golden et al., 1998; Thomas and Dieckmann, 2009). Pringle et al. (2009) studied single-crystal laboratory-grown ice using  $\mu\text{CT}$  to examine the thermal evolution of brine inclusions. They found that brine volume fraction and pore space structure depend upon temperature, with a percolation threshold observed at  $4.6 \pm 0.7\%$ . However, one expects natural polycrystalline ice to have a higher threshold as pathways are sensitive to grain boundaries, flaws, and a certain degree of horizontal transport (Pringle et al., 2009). Since different growth rates in natural sea ice produce different average spacing

between brine layers, there is also the potential for varying percolation thresholds and degree of connectivity with depth (Nakawo and Sinha, 1984; Petrich et al., 2006; Pringle et al., 2009).

Network models have successfully been employed in a variety of fields to describe complex phenomena and predict future behaviour, in particular fluid flow in porous media (e.g., Golden, 1997; Berkowitz and Balberg, 1992; Fatt, 1956). Specific to sea ice, Freitag (1999) utilized a Lattice-Boltzmann model to model fluid flow through sea ice. Meanwhile, Golden et al. (1998) examined critical percolation thresholds in their network model of sea ice. More recently, Zhu et al. (2006) used a two-dimensional pipe network model to simulate fluid flow through sea ice using a fast multigrid method. This network compared well with lab data for porosity above 0.15, but overestimated permeability at lower porosities (Golden et al., 2007). The majority of these models generate connectivity networks based on bulk brine properties. Here we derive finer-grained statistics empirically, allowing for models to more closely align with the physical properties of sea ice.

In this manuscript, we develop a methodology for describing the morphology and variability of brine networks in a vertical column of first-year sea ice. We construct a network model of the pore structure of sea ice and use topological techniques to characterize this brine network. This yields a set of network statistics that characterizes channels of different depths and temperature, which we can later use to inform more sophisticated models of sea ice. Our framework enables us to statistically replicate the pore structure of sea ice at different depths and temperatures. Future applications include refining under what conditions the “Rule of Fives” applies, predicting bulk physical properties such as heat transfer and fluid permeability, and improving the ability to describe processes such as brine drainage and desalination. This approach provides advances in quantifying the brine connectivity in sea ice, which we can then incorporate into both global and regional sea ice models.

## 2 Methods

This work will focus on two of the ice cores extracted from different locations in the Ross Sea, Antarctica during a October - November 2012 field campaign. The 1.78 m Butter Point ice core was collected at  $77^{\circ}35.133' \text{ S}$  and  $164^{\circ}48.222' \text{ E}$  and had a temperature gradient ranging from  $-16.1^{\circ} \text{ C}$  at the top to  $-2.5^{\circ} \text{ C}$  at the bottom. For this core, the top 14 cm was frazil ice, the columnar ice region was from 14 cm to 65 cm, and platelet ice formed the bottom 64% (Obbard et al., 2016). The 1.89 m Iceberg Site ice core was located at  $77^{\circ}7.131' \text{ S}$  and  $164^{\circ}6.031' \text{ E}$  and had a temperature gradient ranging from  $-17.7^{\circ} \text{ C}$  at the top to  $-2.3^{\circ} \text{ C}$  at the bottom. Relative to the Butter Point core, the Iceberg Site core had more frazil ice (0 cm to 30 cm), more columnar ice (30 cm to 137 cm) and less platelet ice (137 cm to 189 cm) (Obbard et al., 2016). Immediately following core extraction, we recorded the temperature profile at 10-cm intervals, and stored the cores in a  $-20^{\circ} \text{ C}$  freezer at McMurdo station prior to shipping. We then transported the cores at a constant temperature of  $-20^{\circ} \text{ C}$  back to Thayer School of Engineering’s Ice Research Laboratory at Dartmouth College, and stored them in a  $-33^{\circ} \text{ C}$  cold room prior to analysis. Cubic sub-samples measuring 1 cm on edge were taken from each core at 10-cm intervals. We used x-ray micro-computed tomography ( $\mu\text{CT}$ ) to image each sub-sample following the protocol developed by Lieb-Lappen et al. (2017). We scanned each sub-sample from these two cores at in-situ temperatures using a Peltier cooling stage attached to our Skyscan 1172  $\mu\text{CT}$  scanner, and analyzed the three-dimensional morphological data.

We build on the methodology of Lieb-Lappen et al. (2017) to convert the binarized images of the brine phase to a simplified representation as a network. Network models are now ubiquitous across many fields as they provide mathematical descriptions of complex phenomena that are amenable to detailed analysis. Abstractly, a network is a collection of *nodes*,  $N$ , and *edges*,  $E$ . Most generally, an edge is an ordered pair of nodes,  $e = (i, j)$ , signifying a connection flowing from node  $i$  to node  $j$ . The network we build for our application captures the structure of the brine channels, but without all of the finest details. This network retains salient permeability properties of the brine network while discarding less relevant but complex fine-grained features. Our motivation is two-fold. First, the network presentation allows us to easily analyze permeability of the ice core samples in terms of network features. Second, the network structure is rich enough to provide empirical estimates for the brine pore structure in first-year sea ice at different temperatures. These estimates give a statistical description of brine channel structure which we can use to inform percolation and flow models.

Our model is, in a sense, a refinement of other network models used to study transport within sea ice. Percolation models, such as those developed to justify the “Rule of Fives” (Golden et al., 1998), rest on underlying network connectivity models of brine pockets within sections of ice. While most of these models use bulk brine properties to form a statistical basis for generating the connectivity networks, our work derives finer-grained statistics empirically, allowing for models more closely aligned with the physical properties of sea ice. This approach occurs in other related fields: soil scientists and geologists used network models of pore space to study similar problems of connectivity and permeability in a different porous medium (e.g., Pierret et al., 2002; Delerue et al., 2003).

To create our network, we must identify nodes and edges between them that reflect the structure of the brine channels in the sample. To begin, we think of a sample as a cube in three dimensional space,  $\mathbb{R}^3$ , using standard Cartesian coordinates denoted by  $(x, y, z)$ . We fix the vertical coordinate,  $z = C$ , to identify a horizontal slice of the sample at height  $C$ . For such a slice, we associate a node to each distinct brine pocket. Fig. 1 shows four horizontal slices associated to consecutive  $z$ -values, that we use to describe this process. In those images, ice is grey, air is black, and brine is white in color. In the topmost image in the stack, where  $z = z_0$ , we see 10 white regions showing the brine within that slice. To define a node associated to the  $i^{\text{th}}$  region, we consider the collection of points,  $\{(x_i^k, y_i^k, z_0)\}_k$ , that make up that region and calculate their centroid,  $p_i = (x_i^*, y_i^*, z_i^*)$ , which labels the node. Centroids are reasonable approximations of the positions of the regions since the brine inclusions in each horizontal slice are primarily convex polygons with the centroid located inside the connected component (Heijmans and Roerdink, 1998). While this label records the position of the brine region, it contains no additional information, so we record an approximation of the size of the brine region along with each node. We fit an ellipse to the region and we define the throat size of the region, denoted  $r_i$ , by the length of its semi-minor axis. The red ellipses in Fig. 1 are examples of ellipses that allow us to calculate these throat sizes. Repeating this procedure for all values of  $z$  gives a complete list of nodes,  $\{p_i\}$ , in the network, with the associated throat sizes,  $\{r_i\}$ . We note that this process is a version of the *maximal ball* method (Dwyer, 1993; Silin and Patzek, 2006) for creating networks from image data. While other methods exist – e.g., random pipe, medial axis, and flow velocity methods (Zhu et al., 2006; Dwyer, 1993; Silin and Patzek, 2006; Dong et al., 2008) – our choice of method best fits the  $\mu$ CT data.

Our collection of node-throat size pairs gives an approximation of the brine structure in sea ice sample but lacks an important feature - it does not specify how the brine regions are connected to one another from one horizontal slice to another. Including edges between nodes allows us to encode this feature. We define an edge from node  $p_i$  to node  $p_j$  if the pair meet two conditions: first, that node  $p_j$  appears on the horizontal slice just below that of node  $p_i$  and second, that the brine regions represented by nodes  $p_i$  and  $p_j$  overlap when projected onto the same image. We can formalize these conditions as follows. We define an edge from node  $p_i$  to node  $p_j$  if

1.  $z_j^* = z_i^* - 1$
2.  $\{(x_i^k, y_i^k)\}_k \cap \{(x_j^k, y_j^k)\}_k \neq \emptyset$ .

In the language of networks (Newman, 2011), this is a *directed* edge as it points in a direction which, in this case, records the direction of our progression through the sample. In some of our calculations, we will ignore the direction, treating the edge as signaling the bi-directional connection between the two brine regions. Figure 1 shows several edges between nodes, including one from node  $p_{i_1}$  to  $p_{i_2}$ , denoted by dashed black lines. In that figure, we can see that as we move from  $p_{i_1}$  to  $p_{i_2}$  and further down the vertical axis, the throat size of the brine channel shrinks. This is not the only behavior - some channels shrink and eventually disappear, new brine pockets sometimes appear below areas of ice. Others split into multiple distinct regions, while others still join together.

With the definition of the network in place, we next introduce terminology which helps describe the evolution of a brine channel as it progresses through an ice sample. For a fixed node  $p_i$ , if the intersections in the second part of the definition of an edge above are empty for all other nodes, we say that node has *died* moving from slice  $z = z_i^*$  to slice  $z = z_i^* - 1$ . If there is only one non-empty intersection, we say the node *remains*. On the other hand, if there are multiple non-empty intersections, we say  $p_i$  *splits*. Last, if more than one node at height  $z$  overlaps with a single node at height  $z - 1$ , we say that those nodes *join*. This terminology allows us to depict the vertical connectivity of the brine phase. Our definition precludes horizontal connectivity as the horizontal extent of a brine region is captured in the definition of the associated node. Since brine channels are primarily vertically oriented with branches splitting both upwards and downwards, this network definition yields a good model for depicting brine movement through the sample.

With this mathematical description of the brine structure, we can calculate statistics about its evolution. For a fixed throat size,  $r$ , we compute the probabilities of a node of this size remaining, dying, splitting, or joining. The probability of a node of throat size  $r$  remaining in the next step but changing to throat size  $s$  is the number of connections  $((x_i^*, y_i^*, z_i^*), r) \rightarrow ((x_j^*, y_j^*, z_j^* = z_i^* - 1), s)$  divided by the number of nodes of throat size  $r$ :

$$P_{\text{remain}}(r \rightarrow s) = \frac{\#\{((x_i^*, y_i^*, z_i^*), r) \rightarrow ((x_j^*, y_j^*, z_j^* = z_i^* - 1), s)\}}{\#\{i | r_i = r\}}.$$

For our discussions in this paper, we aggregate these fine statistics into a single statistic recording the probability that a node of throat size  $r$  remains in the next level:

$$P_{\text{remain}}(r) = \frac{\sum_{s>0} \#\{((x_i^*, y_i^*, z_i^*), r) \rightarrow ((x_j^*, y_j^*, z_j^* = z_i^* - 1), s)\}}{\#\{i | r_i = r\}}.$$



Similarly, we can calculate the probabilities that nodes of size  $r$  die, split, or join. Taken together, these probability distributions summarize the evolution of the brine channels in the ice sample statistically.

In summary, the set of probabilities defines a discrete-time probabilistic process. Given a node at a particular height  $z$  and throat size  $r$ , we know the possible outcomes for this node at height  $z - 1$  - remaining, dying, splitting, or joining - and the chance that they occur by looking at the approximations of the probabilities of their occurrence. In other words, taking the collection of  $\{p_i, r_i\}$  as states and the probabilities as transition probabilities, we have defined a Markov chain modeling the evolution of brine channels within the sample.

### 3 Results: $\mu$ CT 3-D Imaging

We first used standard morphological metrics as defined in previous work to describe the brine network shape and size (Lieb-Lappen et al., 2017). Fig. 2 shows the brine volume fraction, definition, and shape of the brine phase for the Butter Point and Iceberg Site ice cores. The trends in the top half of the core are similar to what we expect since the temperature in the top half of the core is relatively cold and the expected brine volume fraction is small. However, at around 100 – 120 cm the brine volume fraction begins to increase and the expected c-shape profile begins to appear. Although this trend persists for a few samples, it does not continue as we would expect into the bottom of the core for the warmest temperature samples. This suggests that perhaps the Peltier cooling stage was not warming the temperatures of those samples above approximately  $-7^\circ\text{C}$ . Since the average temperature of the cold room housing the  $\mu$ CT scanner was  $-8^\circ\text{C}$ , either the cooling stage warming mode was not functional or was overcome by the ambient temperature. This may highlight that the cooling stage is not sufficiently warming the ice, but instead produces a slush in the pore space that has x-ray attenuating properties between ice and brine. Segmenting all the slush with the brine phase (assuming it is possible to isolate only the slush from signal noise) leads to an overestimate of the brine phase and an inaccurate depiction of brine channel size and connectivity. Conversely, segmenting the slush with the ice phase leads to an underestimate of the brine phase and also an inaccurate depiction of the brine channels. We used segmentation thresholds that split the difference with a threshold halfway between the peak of the brine phase and the peak of the ice phase, recognizing that there was indeed error in segmentation for these warmer samples. Thus, we will treat data points at depths below roughly 120 cm with caution. Unfortunately, this encompasses the region where the brine volume fraction crosses the 5% critical threshold, limiting our ability to examine the “Rule of Fives” in this manuscript.

Since the cooling stage did not significantly warm samples beyond  $-7^\circ\text{C}$ , we were not surprised that general trends shown in Fig. 2 for all metrics did not differ significantly from the same samples scanned isothermally and presented in Lieb-Lappen et al. (2017) as the percolation threshold was not crossed. As in Lieb-Lappen et al. (2017), we used the structure model index ( $\text{SMI} = 6 \left( \frac{S' \times V}{S^2} \right)$ , where  $S'$  is the derivative of the change in surface area after a one pixel dilation,  $V$  is the initial volume, and  $S^2$  is the initial surface area) to quantify the similarity of the brine phase to plates, rods, or spheres. To quantify size, we calculated a structure thickness by first identifying the medial axes of all brine structures and then fit the largest possible sphere at all points along said axes. The structure thickness is defined as the mean diameter of all spheres over the entire volume. The structure separation is the inverse metric, providing a measurement on the spacing between individual objects. We then

calculated the degree of anisotropy by finding the mean intercept length for a large number of line directions, and forming an ellipsoid with boundaries defined by these lengths. The eigenvalues for the matrix defining this ellipsoid are calculated, and correspond to the lengths of the semi-major and semi-minor axes. The ratio of the largest to smallest eigenvalues then provides a metric for the degree of anisotropy, with 0 representing a perfectly isotropic object and 1 representing a completely anisotropic object. We observed that the brine phase specific surface area increased with depth, structure model index was roughly 3 (indicative of cylindrical objects), structure thickness decreased, structure separation increased, and the degree of anisotropy increased throughout the middle of the core (Fig. 2). From the metrics above, we conclude that brine channels are primarily cylindrical in shape with more branches at lower depths, consistent with previous observations (Lieb-Lappen et al., 2017).

We compared the  $\mu$ CT-measured brine volume fraction to expected values derived from the Frankenstein and Garner relationship relating temperature, salinity, and brine volume fraction (Frankenstein and Garner, 1967; Cox and Weeks, 1983). For this analysis, we used the core temperatures measured in the field and salinity values estimated from ion chromatography measured chloride concentrations presented in Lieb-Lappen and Obbard (2015). This yielded expected brine volume fractions for the two cores shown in Fig. 3. From 0 cm to 120 cm, the measured brine volume fractions match the expected values remarkably well. However, below a depth of 120 cm in both cores, the expected brine volume fraction is greater than that measured using  $\mu$ CT. For example, at a depth of 160 cm the expected brine volume fraction is 4.5 and 4.2 times greater than the values measured for samples from the Butter Point and Iceberg Site ice cores, respectively. This provides an estimate for the degree by which the cooling stage failed to heat the warmer samples in the  $\mu$ CT.

## 4 Results: Brine Network Model

### 4.1 Model Definitions

From the binarized images of the brine phase for the Butter Point and Iceberg Site ice cores, we created a mathematical network. We will use the term *network* to refer to the entire brine phase of a given sample and/or the entire brine phase of all samples in a given core. For a given sample, we define each brine *channel* to be a single connected region in the brine network. The number of brine channels per sample ranged from 830 to 4800, with maximum numbers occurring in samples from the top and bottom of the cores. Previous work showed that these brine channels often appear in layers or sheets spaced approximately 0.5 – 1.0 mm apart due to the ice growth mechanism and original skeletal structure (Weeks and Ackley, 1982). A single brine channel is a complex web containing many different parts, which we will call the *branches* of the brine channel. As defined previously, a *join point* is the node where two branches come together and a *split point* is the node where a single branch splits into multiple branches. We note that flipping the perspective of movement from downwards to upwards changes a *split point* into a *join point* and vice versa. This is an important observation since we did not record the vertical orientation of the samples during cutting. Using this terminology, we use techniques from network theory to topologically characterize the brine network, gaining further insight into the connectivity and implications for permeability.

In the analysis below, we use several metrics to describe the topology of the brine network that have important fluid flow implications. We first look at the throat sizes of the brine channels to gain an insight into the quantity of fluid that can move through different regions of a given brine channel. We then look at specific branches, both in terms of the number of branches and the size of each branch to learn more about the specific pathways available for fluid movement. As part of this analysis, we incorporate our various transition probabilities to understand how the likelihood of a given branch to split into multiple branches depends upon the throat size of the parent branch. Finally, we will examine the size distribution of particular paths, looking for “pinch points” that may restrict flow and large regions that can provide maximum flow through the network. Together, these metrics will provide a detailed description of the micro-scale complexity of the brine network.

## 4.2 Throat sizes of channels and branches

For each brine channel we calculated the average throat size  $\{\bar{r}_i\}$  for all nodes  $\{p_{si}\}$  at a given depth in the sample. Fig. 4 and Fig. 5 show the collection of these throat sizes for the five largest (by vertical extent) brine channels at each depth for the Butter Point and Iceberg Site cores, respectively. We note that since the entire length of the cores were not scanned, there is no correlation between the five brine channels selected from one subsample (e.g. 20-cm depth) to the next (e.g. 30-cm depth). There were 6 brine channels in each core that connected from the top to the bottom of their respective subsample, with the majority of these channels found in subsamples from the top of each core. Generally speaking, the lengths of the vertical extent of the longest channel decreased with depth from the top of each core to around 60 cm, increased from 60 cm to roughly 120 cm, and then decreased from 120 cm to the bottom of the core. The trend between the top of the core and roughly 120 cm is consistent with what we would expect due to brine volume fraction, temperature, and the expected c-shape profile. The channels from the lower depths, which had even warmer temperatures, did not reach in-situ temperatures during scanning as described previously. We also note that both the lengths of the vertical extent and average throat size quickly diminished for channels beyond the few largest ones, as can be seen in the bottom panel of Fig. 4 and Fig. 5. Thus, we learn that fluid flow is most controlled by the behavior of the largest brine channel for a given section of sea ice.

The number of branches for a particular brine channel has potentially significant implications for fluid flow and permeability, such as influencing the rate at which chemical species may pass through the sea ice (Santiago et al., 2014; Yang et al., 1995; Newman, 2011). By increasing the number of branches, split points can increase the number of potential paths through the sample. A higher number of paths increases the probability of finding a path connecting the top and bottom of a sample, thereby crossing the percolation threshold (Sahimi, 2011). Alternatively, split points can represent bottle-necks if the resulting child branches have smaller throat sizes than the parent throat, measured either as a minimum or as an aggregate. We observed that the largest channel in a cubic sample had by far the largest number of branches, with the quantity dependent upon the ice type. For example, in a columnar ice sample (70-cm depth of the Butter Point ice core) the largest channel had a maximum of 20 branches at a given depth within the sample. For comparison, the maximum number of branches for a sample in the frazil ice region at the top of the core was 124 nodes at a single depth. As expected, we find that brine channels in frazil ice have many more branches than brine channels in columnar ice, providing more distinct pathways for brine to move through the sample.

To gain insight into the behaviour of a channel, we visualized the number of branches and distribution of throat sizes by plotting the throat size  $r_i$  of each node  $p_i$  for the largest brine channel. Fig. 6 and Fig. 7 shows the throat sizes as a function of depth in the sample for three different representative sample depths: top, middle, and bottom of the Butter Point and Iceberg Site cores, respectively. For each channel shown, there is a plot of  $\{r_i\}$  at each depth sorted by physical location in a two-dimensional grid (working line by line), not by size. A second corresponding plot shows node sizes sorted by descending  $\{r_i\}$  for a given depth in the channel. The first plots illustrate the connectivity of given branches, while the second plots provide a visualization of the distribution of  $r_i$ . The sample taken from the top of each core is from a region of frazil ice, which we would expect to have brine channels that are not well connected and have a distribution of throat sizes independent of depth in the sample. In both Fig. 6 and Fig. 7, panel (a) confirms this while panel (b) shows that there was an even distribution of throat sizes. The two plots for mid-depth networks (70 cm) are quite similar, illustrating less tortuosity and easier ability to track particular branches in the brine channel. The bottom sample of the Iceberg Site core had much larger throat sizes, although this sample was an anomaly in Fig. 2. We did not observe a direct correlation between the number of branches and the throat size of those branches, as the distribution of throat sizes appeared to be more dependent upon the particular depth of the sample in the ice core, and consequently, the ice type of that sample. From this analysis, we learn that although there may be more branches for a given brine channel in frazil ice, the branches have better vertical connectivity in columnar ice. This means that fluid can more readily move upwards or downwards through the larger well-connected brine channels in columnar ice.

### 4.3 Probability distribution of branching nodes

Next we examined the branching of particular nodes to understand the behavior of particular fluid flow paths. Following a branch of a channel downwards, at an individual node the branch may end, continue onwards, or split into multiple branches. Conversely, by looking upwards, a node can be considered to be the first in a new branch, the continuation of a branch, or the joining point of multiple branches. Thus, for each node in a brine channel, we can count the number of edges above (incoming) and below (outgoing) to determine the degree of splitting or joining of branches in the channel (Newman, 2011). The large majority of nodes do not display branching, and the number of two-way splits/joins was roughly the same as the number of times a branch started/ended. We observed decay in frequency with increasing quantity of splits/joins. The Iceberg Site core had a larger number of higher order branching with a significant number of 7-way or 8-way splits/joins. A branch that splits is most likely to split into only two child branches, and thus for example, a contaminant introduced at a point source is likely restricted to a small horizontal region, following only a few separate paths through the ice. When a split occurred, we compared  $r_i$  for the parent node to the collection of  $r_i$  for the children nodes with similar behavior observed in both cores. 84% of the time for the Butter Point core and 86% of the time for the Iceberg Site, the sum of the throat sizes for the children node were greater than that of the parent node. However, the parent node was still larger than the largest child node 67% of the time for the Butter Point core and 68% of the time for the Iceberg site core. Thus, we learn that larger brine channels are more likely to split than smaller channels, and after the split, the fluid can access a larger region of the sea ice.

With knowledge of the total number of split points and join points, we then investigated the likelihood that branching was dependent upon the throat size. Fig. 8 shows the probability distributions for pockets dying, remaining, joining, and splitting

for two regions of each of four samples, frazil ice and columnar ice. Note that for these plots, we used two additional first-year sea ice cores from previous work in addition to the Butter Point and Iceberg Site cores (Lieb-Lappen et al., 2017). The most basic difference between the two regions is that larger pocket sizes do not appear in columnar ice. However, for ranges of  $r$  occurring in both regions, the shapes of the plots are similar. While small pockets can disappear, larger ones generally do not – the probabilities tend to zero (as marked by arrows in the plots in the first column). For pockets that remain but do not split or join with others, smaller pockets remain with lower probability (because more of them vanish) but then the probabilities follow an inverted parabolic trajectory, peaking around  $r = 130 \mu m$ . An interesting difference appears as throat size grows. In columnar ice, for throat size around  $r = 500 \mu m$ , we see two distinct behaviors. Some sizes remain with probability one (indicated by the top arrow in the second plot of the second row), while others remain with probability zero (bottom arrow). For the latter, looking at the last plot in the bottom row, we see these pockets are splitting into two or more pockets (indicated by the top arrow in that plot). This gives a signature for columnar ice – most brine channels simply continue on with slightly varying throat size but the ones that change generally split, creating a fork in the channel.

In frazil ice, the story for pockets which vanish is the same, as throat sizes become larger, they do not vanish in the next level. For remaining, splitting, and joining, however, there are new wrinkles in frazil ice relative to columnar ice. For pockets that remain, for larger throat sizes we see three types of behavior, two of which are similar to the behaviors in columnar ice (indicated by the top and bottom arrows of the second plot in the first row). But, a third behavior, where fifty percent of pockets remain, is new for frazil ice (middle arrow). This new behavior is echoed in the probabilities of splitting and joining (indicated by the middle arrows in those plots) which shows that in this regime, brine channels have a complex behavior, remaining, splitting, and joining with high frequency. This third category of behavior for large throat sizes is a signature of frazil ice.

In addition, we summed the total number of edges leaving (splits) and entering (joins) each node over all nodes for the five largest brine channels of each sample. Fig. 9 plots these raw counts and the difference between the two are given for the Butter Point and Iceberg Site cores. When we consider split points and join points separately, we are considering the network as a graph with directed edges. The difference between the number of splits and joins (i.e. difference between number of incoming and outgoing edges) is a metric for the topological complexity of a network. The raw counts for number of splits and joins both had roughly a c-shape profiles for both cores, with largest values and variability observed towards the bottom of the core. This is to be expected because the warmer part of the core allows for greater interconnectivity of branches in the brine network. For all brine channels, the number of splits was quite similar to the number of joins, and hence the differences between the two were quite small. However, there was still a general c-shape profile between 0 cm and 140 cm, indicating that topological complexity is greatest near the top and bottom of the core. This is consistent with frazil ice in the top of the core and increased branching in the warmer ice. Interestingly, both cores showed a decrease in topological complexity for the lowest samples below 140 cm. This could either be an artifact of not achieving actual in-situ temperatures with the cooling stage, or potentially an indication of a thought-provoking trend. If samples were not reaching in-situ temperatures, isolated channels may not have rejoined upon warming from storage temperatures, thereby reducing the number of split points and join points. Alternatively, a possible explanation of a real trend could be that as brine channels widen for the warmest samples, branches join together,

reducing the topological complexity. A consequence of reducing the number of branches is a reduction in the number of split points and join points.

#### 4.4 Capacity for fluid flow

We next examined the fluid flow capacity of each channel by both summing the number of pixels associated with all nodes for each channel and summing the total throat sizes of all nodes in each channel. We note that this represents a region larger than the pathways used for current fluid flow since many branches do not connect the top of a sample to the bottom. However, when the ice begins to warm and the branches become more interconnected, the process will likely start from the existing regions containing brine. Thus, this metric offers a starting place for comparing the capacity for fluid flow across different samples. Fig. 10 shows cumulative distribution functions for the number of brine channels as functions of the total number of pixels in the channel, with each line represents a different sample depth. The lines are colored on a gradient from red representing the top of the core to blue for the bottom of the core. The distribution functions for all depths on both cores were remarkably similar, and pairwise Kolmogorov-Smirnov tests did not detect that any two curves were from different probability distributions ( $p \geq 0.1$ ) (Massey, 1951; Graham and Hogg, 1978). Both cores did show a trend of increased probability of brine channels with more pixels occurring at shallower depths, with a more robust trend observed in the Iceberg Site core. This trend could be due to samples at lower depths having an increased number of isolated small channels that have yet to connect to larger channels. Since there is doubt as to whether the samples below 120 cm were scanned at their in-situ temperatures, perhaps these small isolated channels would have connected to larger channels under warmer conditions. Fig. 11 presents similar cumulative distribution functions for the number of brine channels as functions of the summed throat size of all nodes in the channel. The curves yield the same observations as before, with the Iceberg Site core again having a stronger correlation of increased probability of larger channels occurring at shallower depths. Likewise, Kolmogorov-Smirnov tests did not detect any two curves representing different probability distributions ( $p \geq 0.1$ ). Any noticeable changes to the relative shape of the curves represent disproportionate changes in the shape of the brine channel with size of the channel, however, these variations were quite minor. In general, the shape of the curves in Fig. 11 are similar to those in Fig. 10. Thus, we conclude that brine channels in samples near the top of the core provide fluid with multiple distinct pathways to move through the sample, while deeper in the core there are only a few large channels with many small isolated paths that may connect under warmer ice conditions.

#### 4.5 Following individual fluid flow paths

To further assess fluid flow capabilities, we analyzed individual branches of brine channels to isolate particular paths through the network. By construction, moving from  $p_i$  to  $p_j$  along an edge must either increase or decrease the height in the sample by one step (15  $\mu\text{m}$ ). First, we allowed only downward flow along the edges, considering paths starting from the first node. Since the network does not allow lateral movement, each step along an edge corresponds to a 15  $\mu\text{m}$  step downwards. Although previously 6 brine channels were found that connected the top to the bottom of a given sample, no such paths were found in the directed graphs. This is because all paths connecting the top to the bottom of a sample required some movement upwards along a branch in order to reach the bottom. Fig. 12 shows an example of a brine channel where although the network is connected,

any connecting path involves both upward and downward flow, such as the path highlighted in red. Thus, we selected the longest downward directed path from each brine channel, as well as any additional paths of the same length. This mimics a natural process such as gravity drainage, allowing us to study its influence on brine movement in the absence of pressure forces that aid upwards transport. Summing over all brine channels in the Butter Point core resulted in 63 763 directed paths. From this collection, we could selected the 15 316 paths of length 50 steps ( $750 \mu\text{m}$ ) for statistical analysis of minimum throat size ( $r^{min}$ ), maximum throat size ( $r^{max}$ ), and summed throat size. Future work will use this model to statistically recreate brine channels that have this same statistical distribution of brine channel sizes.

We completed a similar analysis on the brine channel network, however this time allowing for both upward and downward flow. Allowing for upward flow can present a challenge in tracking various pathways if there is a repeating loop. Thus, we only considered paths that reached every node but had no loops. In the language of networks, we avoided complexities arising from cycles by only considering different spanning trees. We used a depth-first search algorithm to find all paths reaching the maximum vertical extent of each channel (West, 2001; Newman, 2011). We checked results through comparison of the distance obtained using Dijkstra’s algorithm for finding the shortest-path tree (West, 2001; Dijkstra, 1959). This resulted in 36 449 paths over all the brine channels in the Butter Point core, of which 1753 were of length 50 steps ( $750 \mu\text{m}$ ). We note that we can use the adjacency matrix to calculate the number of different walks (paths including cycles) that connected the top and bottom of a sample (West, 2001). However, due to the size of the adjacency matrix, this became computationally too expensive for large brine channels.

We used the 1753 paths of length  $> 50$  steps to develop probability distributions for basic network statistics important for fluid flow such as  $r^{min}$ ,  $r^{max}$ , and summed throat size of the path. These statistics can yield valuable information regarding the location and distribution of “pinch points,” large channels, and total fluid flow through a brine channel. First, the paths were split into 3 categories based upon the ending node ( $p_f$ ) throat size:  $r_f < 1500 \mu\text{m}$ ,  $1500 \leq r_f < 5250 \mu\text{m}$ , and  $r_f \geq 52 500 \mu\text{m}$ . Then, we split each category into 3 groups based upon the throat size of the starting node ( $p_1$ ), using bins of the same size ( $r_1 < 1500 \mu\text{m}$ ,  $1500 \leq r_1 < 5250 \mu\text{m}$ , and  $r_1 \geq 52 500 \mu\text{m}$ ). This division resulted in splitting the paths into 9 separate sub-categories. For each sub-category, we calculated the probability distributions for  $r^{min}$ ,  $r^{max}$ , and summed throat size of the path and we present these histograms in Fig. 13. All plots are color-coded by  $r_1$ , with red, blue, and green histograms representing small, medium, and large throats, respectively. All histograms show the similar trend that both  $r_1$  and  $r_f$  have a strong influence on resulting metrics, with larger  $r_1$  and/or  $r_f$  having larger  $r^{min}$ ,  $r^{max}$ , and total volumes.  $r_f$  had slightly more of an impact, particularly on  $r^{min}$ . There were no clear general trends in regards to the shape of the distributions. However, we note that for the smallest  $r_f$ , all three histograms for  $r^{min}$  had a large peak around  $30 \mu\text{m}$  (Fig. 13, top row). This peak corresponds to the smallest measurable branches, and we could potentially remove these paths from current fluid flow analysis. However, as the ice begins to warm, these “pinch points” are likely to have a significant impact on crossing percolation thresholds.

## 5 Conclusions

The primary objective of this manuscript was to characterize the brine channel topology, morphology, and connectivity, thereby providing the statistical framework that we can use to create a sea ice brine channel network model. Since there was roughly a linear relationship between sample temperature and depth in the ice core, trends observed with one variable could easily be converted to the other. Here we have presented quantitative metrics of the brine channel topological complexity, degree of connectivity, average and individual throat sizes, probability distributions for branches to split and join, capacity for fluid flow. The probability distributions shown represent a sampling of the various microstructural behaviours needed to statistically create a brine channel network parametrized by depth and temperature.

Overall, we observed similar profiles for both first-year sea ice cores. Both cores had the expected c-shape profile for throat sizes. Topological complexity also had a similar c-shape profile that is consistent with complex frazil ice in the top of the core, relatively cold columnar ice below it, and increasingly warmer columnar ice at lower depths. We did not have good success in imaging and thresholding platelet ice as we were not able to reach the warmest in-situ temperatures at the bottom of the core. We observed more branching in frazil ice than columnar ice, but better vertical connectivity in the columnar ice and thus better capacity for fluid flow. By analyzing probability distributions for branching, we developed characteristic signatures for each ice type. For columnar ice, most brine channels simply continue downwards with little change in throat size. However, for channels in which there is a significant change in throat size, there is a likely fork leading to a split in the channel. Meanwhile, large channels in frazil ice will split, join, and remain, all with relatively high frequencies. Columnar ice had fewer, but larger, channels that showed increased connectivity with warmer ice at lower depths.

When examining the branching in brine channels, we observed that the largest channels had the greatest number of branches, but overall the throat size did not appear to have a direct correlation with the number of branches. Throat sizes were most dependent upon the depth and consequently ice type. When a split in a brine channel does occur, it is most likely to split into two child branches, and after the split, the brine generally has access to a larger region of the sea ice than before. Starting and ending throat sizes are strongly correlated with the flow capacity with larger initial/final throat sizes strongly indicative of increased flow. We detected pinch points in the brine channels that are critical points when determining whether the sea ice cover has crossed the percolation threshold. However, further work is needed in examining warmer ice with greater brine volume fractions.

The next step for this work is to create a brine channel network from the statistics presented here. For a sample at a given depth/temperature, first an initial set of nodes at the top height would be selected, where the nodes have throat sizes consistent with the probability distributions shown here. Branches could grow or shrink, split into multiple branches, join with other branches, remain constant, or stop, all with probabilities dependent upon the given node throat size, depth/temperature, and proximity to other nodes. The model described herein can help address questions such as how microstructural changes may be path dependent (e.g., whether to consider both upwards and downwards flow), how fluid flow may vary with depth, and what are the percolation implications of temperature fluctuations in an ice core. In summary, we successfully developed a method using  $\mu$ CT imaging to characterize the geometry of brine channels, whereby we can parameterize the pore networks



using topological techniques that can be adjusted for depth and temperature, correlated with physical properties, and used in dynamical models of sea ice.

*Acknowledgements.* This research was supported by US National Science Foundation (NSF) grant PLR-1304134. The views and conclusions contained herein are those of the authors and should not be interpreted as representing official policies, either expressed or implied, of the

5 NSF or the United States Government.

## References

- Berkowitz, B. and Balberg, I.: Percolation Approach to the Problem of Hydraulic Conductivity in Porous Media, *Transport Porous Med.*, 9, 275–286, 1992.
- Cox, G. F. N. and Weeks, W. F.: Brine Drainage and Initial Salt Entrapment in Sodium Chloride Ice, Tech. Rep. Research Report 345, CRREL, Hanover, NH, 1975.
- Cox, G. F. N. and Weeks, W. F.: Equations for Determining the Gas and Brine Volumes In Sea-Ice Samples, *J. Glaciol.*, 29, 306–316, 1983.
- Delerue, J. F., Perrier, E., Timmerman, A., and Swennen, R.: 3D Soil Image Characterization Applied to Hydraulic Properties Computation, in: *Applications of X-ray Computed Tomography in the Geosciences*, edited by Mees, F., Swennen, R., Van Geet, M., and Jacobs, P., vol. 215, pp. 167–175, Geological Society Special Publications, London, 2003.
- Dijkstra, E. W.: A Note on Two Problems in Connexion with Graphs, *Numer. Math.*, 1, 269–271, 1959.
- Dong, H., Fjeldstad, S., Alberts, L., Roth, S., Bakke, S., and Øren, P.-E.: Pore Network Modelling on Carbonate: A Comparative Study of Different Micro-CT Network Extraction Methods, in: *Soc. Core Anal. Int. Symp.*, UAE, 2008.
- Dwyer, R. A.: Maximal and Minimal Balls, *Comp. Geom.*, 3, 261–275, 1993.
- Fatt, I.: The Network Model of Porous Media, *Trans. Am. Inst. Min. Metal. Petrol. Eng.*, 207, 144–181, 1956.
- Frankenstein, G. and Garner, R.: Equations for Determining the Brine Volume of Sea Ice from  $-0.5\text{ C}$  to  $-22.9\text{ C}$ , *J. Glaciol.*, 6, 943–944, 1967.
- Freitag, J.: Untersuchungen zur Hydrologie des arktischen Meereises – Konsequenzen für den kleinskaligen Stofftransport., *Ber. Polarforsch/Rep. Pol. Res.*, 325, 1999.
- Golden, K. M.: Percolation Models for Porous Media, in: *Homogenization and Porous Media*, edited by Hornung, U., pp. 27–43, Springer-Verlag, Berlin, Germany, 1997.
- Golden, K. M., Ackley, S. F., and Lytle, V. I.: The Percolation Phase Transition in Sea Ice, *Science*, 282, 2238–2241, 1998.
- Golden, K. M., Eicken, H., Heaton, A. L., Miner, J., Pringle, D. J., and Zhu, J.: Thermal Evolution of Permeability and Microstructure in Sea Ice, *Geophys. Res. Lett.*, 34, 2007.
- Graham, J. E. and Hogg, R. V.: *Studies in Statistics*, Mathematical Association of America, Washington D. C., 1978.
- Heijmans, H. J. A. M. and Roerdink, J. B. T. M.: *Mathematical Morphology and its Applications to Image and Signal Processing*, Kluwer Academic Publishers, Dordrecht, Netherlands, 1998.
- Lieb-Lappen, R. M. and Obbard, R. W.: The Role of Blowing Snow in the Activation of Bromine over First-Year Antarctic Sea Ice, *Atmos. Chem. Phys.*, 15, 7537–7545, 2015.
- Lieb-Lappen, R. M., Golden, E. J., and Obbard, R. W.: Metrics for interpreting the microstructure of sea ice using X-ray micro-computed tomography, *Cold Reg. Sci. Technol.*, 138, 24–35, <https://doi.org/10.1016/j.coldregions.2017.03.001>, 2017.
- Massey, F. J.: The Kolmogorov-Smirnov Test for Goodness of Fit, *J. Am. Stat. Assoc.*, 46, 68–78, 1951.
- Nakawo, M. and Sinha, N. K.: A Note on Brine Layer Spacing of First-Year Sea Ice, *Atmos. Ocean*, 22, 193–206, 1984.
- Newman, M. E. J.: *Networks: An Introduction*, Oxford University Press, New York, 2011.
- Obbard, R. W., Lieb-Lappen, R. M., Nordick, K. V., Golden, E. J., Leonard, J. R., Lanzirotti, A., and Newville, M. G.: Synchrotron X-ray Fluorescence Spectroscopy of Salts in Natural Sea Ice, *Earth Space Sci.*, 3, <https://doi.org/10.1002/2016EA000172>, 2016.
- Petrich, C., Langhorne, P. J., and Sun, Z. F.: Modelling the Interrelationships Between Permeability, Effective Porosity and Total Porosity in Sea Ice, *Cold Reg. Sci. Technol.*, 44, 131–144, 2006.

- Pierret, A., Capowiez, Y., Belzunces, L., and Moran, C. J.: 3D Reconstruction and Quantification of Macropores using X-Ray Computed Tomography and Image Analysis, *Geoderma*, 106, 247–271, 2002.
- Pringle, D. J., Miner, J. E., Eicken, H., and Golden, K. M.: Pore Space Percolation in Sea Ice Single Crystals, *J. Geophys. Res.*, 114, 2009.
- Sahimi, M.: *Flow and Transport in Porous Media and Fractured Rock*, Wiley-VCH, Weinheim, Germany, 2011.
- 5 Santiago, E., Velasco-Hernández, J. X., and Romero-Salcedo, M.: A Methodology for the Characterization of Flow Conductivity through the Identification of Communities in Samples of Fractured Rocks, *Expert Syst. Appl.*, 41, 811–820, 2014.
- Silin, D. and Patzek, T.: Pore Space Morphology Analysis using Maximal Inscribed Spheres, *Physica A*, 371, 336–360, 2006.
- Thomas, D. N. and Dieckmann, G. S.: *Sea Ice*, Wiley-Blackwell, Hoboken, NJ, 2009.
- Weeks, W. F. and Ackley, S. F.: *The Growth, Structure, and Properties of Sea Ice*, Tech. Rep. Monograph 82-1, CRREL, Hanover, NH, 1982.
- 10 West, D. B.: *Introduction to Graph Theory*, Prentice Hall, Upper Saddle River, NJ, 2001.
- Yang, G., Myer, L. R., Brown, S. R., and Cook, N. G. W.: Microscopic Analysis of Macroscopic Transport Properties of Single Natural Fractures Using Graph Theory Algorithms, *Geophys. Res. Lett.*, 22, 1429–1432, 1995.
- Zhu, J., Jabini, A., Golden, K. M., Eicken, H., and Morris, M.: A Network Model for Fluid Transport through Sea Ice, *Ann. Glaciol.*, 44, 129–133, 2006.



**Figure 1.** Sketch illustrating how the brine channel network is defined. Four horizontal two-dimensional slices are shown with lines connecting adjacent nodes (not all lines are drawn).



**Figure 2.** Definition and shape of brine channels scanned with a  $\mu$ CT scanner and a Peltier cooling stage set at in-situ temperatures. The red squares and blue circles represent ice cores from Butter Point and Iceberg Site, respectively.



**Figure 3.** Comparing  $\mu$ CT-measured brine volume fraction to the expected values derived from the Frankenstein and Garner relationship (Frankenstein and Garner, 1967; Cox and Weeks, 1983). Results from the Butter Point (red) and Iceberg Site (blue) cores, where the  $\mu$ CT-measured values are the filled circles and the expected values are the open circles.



**Figure 4.** Average throat size  $\{\bar{r}_{z_i}\}$  for the five largest brine channels of each sample for the Butter Point ice core. For each channel, at a given depth we calculated the average throat size of all nodes and color-coded accordingly. Note that there are only 6 channels that connect the top to the bottom of the sample (at depths of 0, 10, 70, and 120 cm).



**Figure 5.** Average throat size  $\{\bar{r}_{z_i}\}$  for the five largest brine channels of each sample for the Iceberg Site ice core. For each channel, at a given depth we calculated the average throat size of all nodes and color-coded accordingly. Note that there are only 6 channels that connect the top to the bottom of the sample (at depths of 0, 10, 30, 50, and 170 cm).

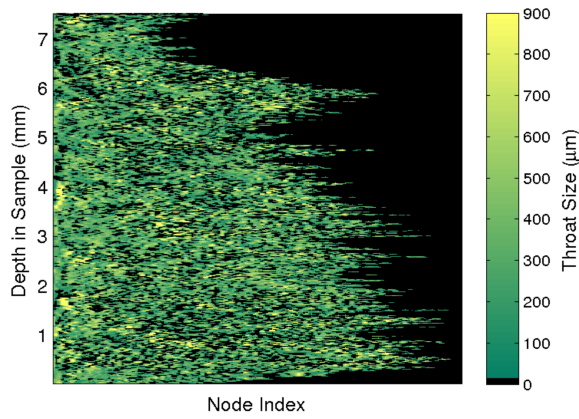

a) Depth 0 cm, unsorted

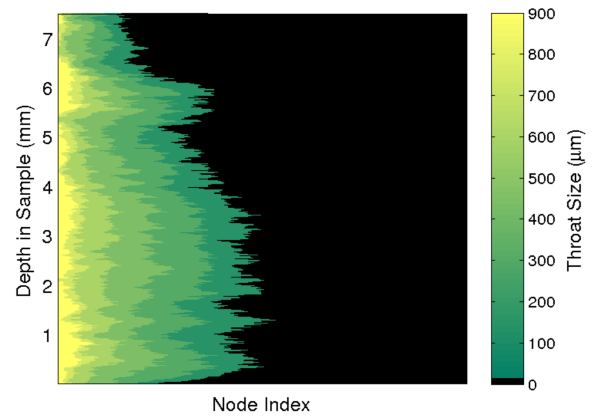

b) Depth 0 cm, sorted

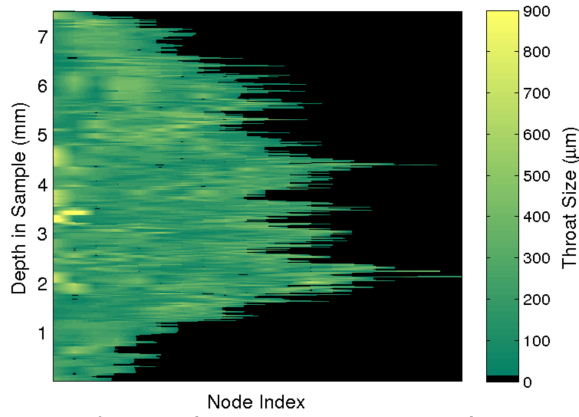

c) Depth 70 cm, unsorted

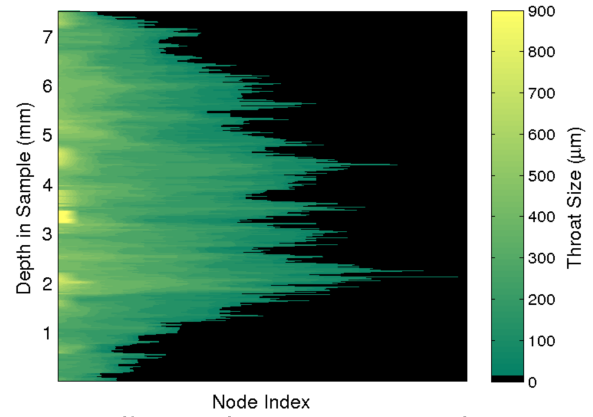

d) Depth 70 cm, sorted

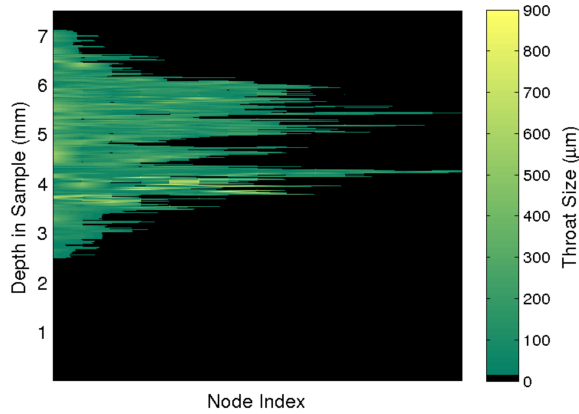

e) Depth 170 cm, unsorted

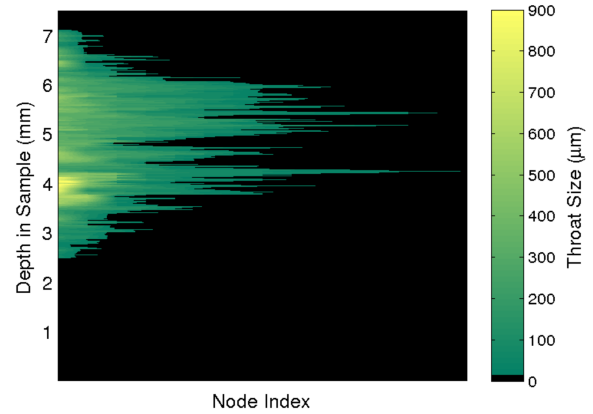

f) Depth 170 cm, sorted

**Figure 6.** Throat size  $r_i$  of each node for the largest channel of representative samples in the Butter Point core. The top, middle, and bottom rows show the largest brine channel from the sample at 0, 70, and 170 cm, respectively. The left panels show the throat sizes at each depth in the sample with nodes sorted by location, not by size. The right panel sorts the nodes by throat size in descending order.



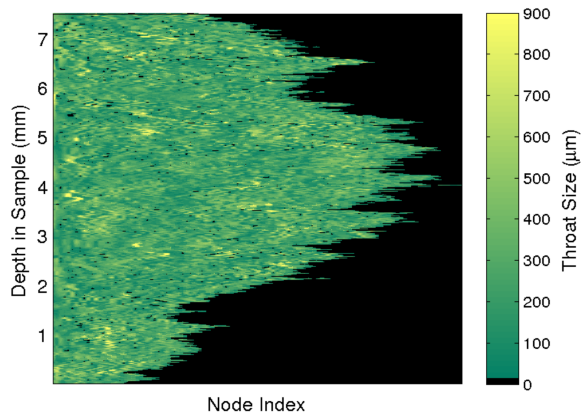

a) Depth 0 cm, unsorted

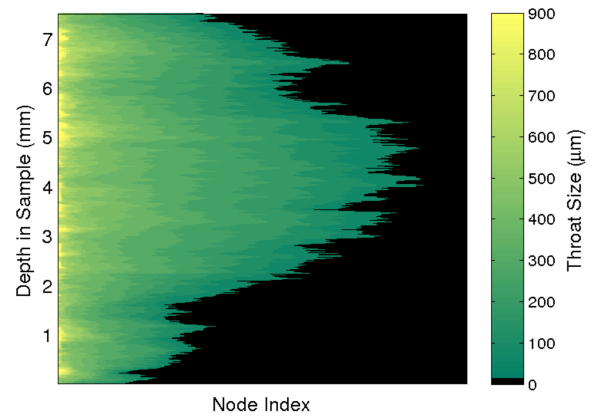

b) Depth 0 cm, sorted

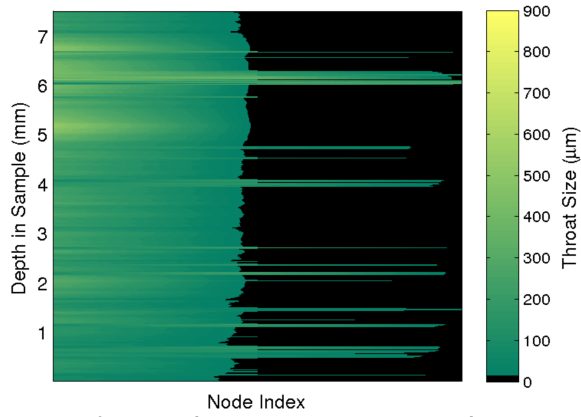

c) Depth 50 cm, unsorted

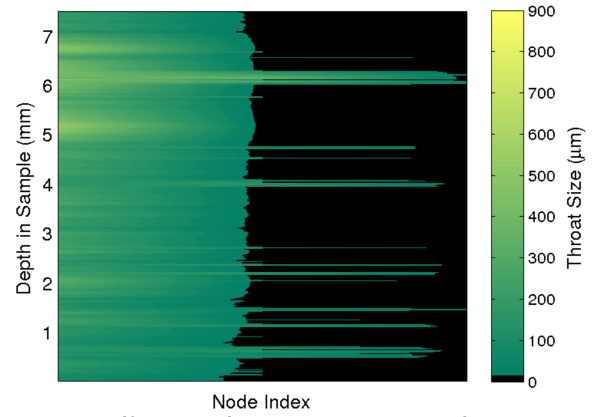

d) Depth 50 cm, sorted

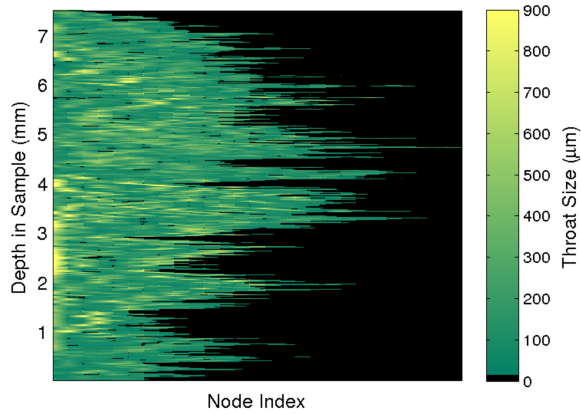

e) Depth 170 cm, unsorted

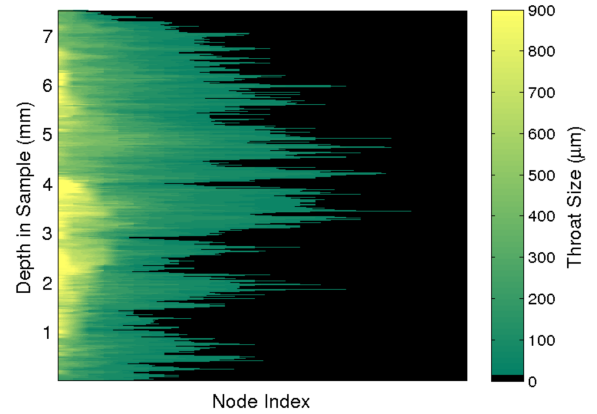

f) Depth 170 cm, sorted

**Figure 7.** Throat size  $r_i$  of each node for the largest channel of representative samples in the Iceberg Site core. The top, middle, and bottom rows show the largest brine channel from the sample at 0, 50, and 170 cm, respectively. The left panels show the throat sizes at each depth in the sample with nodes sorted by location, not by size. The right panel sorts the nodes by throat size in descending order.



**Figure 8.**  $\{r_i\}$  probability distributions showing the likelihood a node dies, remains, splits, or joins as a function of the throat size  $r$ . The top four figures show probability distributions for frazil ice while the bottom four figures show probability distributions for columnar ice. Note that to complete these figures, in addition to the Butter Point and Iceberg Site cores, we used two additional first year sea ice cores from previous work (Lieb-Lappen et al., 2017). Butter Point is shown in black, Iceberg Site is shown in blue, and the two additional first year ice cores are shown in red and black.

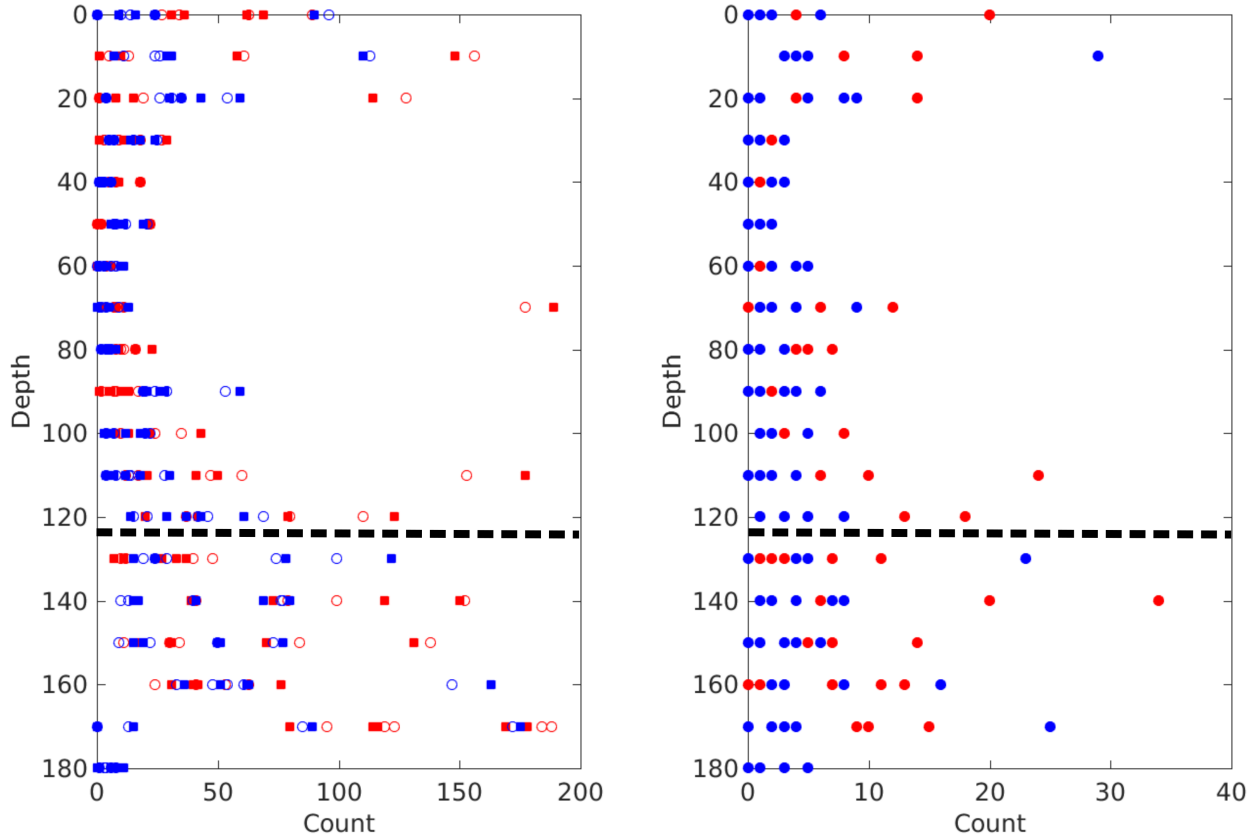

**Figure 9.** Topological complexity of the five largest brine channels in each sample for both the Butter Point (red) and Iceberg Site (blue) cores. The left panel shows the total number of splits (open circles) and joins (filled squares) over all nodes in a given channel. The right panel shows the absolute value of the difference between the number of splits and joins. The dashed line highlights the depth below which there is concern regarding the effectiveness of the cooling stage and whether samples were scanned at actual in-situ temperatures.



**Figure 10.** Cumulative distribution functions for number of brine channels as functions of the total number of pixels in the channel. The left and right panels are for the Butter Point and Iceberg Site ice cores, respectively. In both panels, each line represents a different sample depth where the lines are colored on a gradient from red representing the top of the core to blue for the bottom of the core. Note that pixels in the original  $\mu$ CT images are  $15\ \mu\text{m}$  on each edge.



**Figure 11.** Cumulative distribution functions for number of brine channels as functions of the summed throat size of all nodes in the channel. The left and right panels are for the Butter Point and Iceberg Site ice cores, respectively. In both panels, each line represents a different sample depth where the lines are colored on a gradient from red representing the top of the core to blue for the bottom of the core. Note that throat sizes in the original  $\mu$ CT images are  $15\ \mu\text{m}$  on each edge.



**Figure 12.** Largest brine channel at 70 cm in the Butter Point ice core. Although this brine channel connects from top to bottom, there is not a directed path that does so. Any connecting path involves movements both upwards and downwards. One such path is highlighted in red.



**Figure 13.** Probability distributions of paths connecting the top to the bottom for all brine channels in the Butter Point ice core. Only paths greater than 50 steps, or  $750 \mu\text{m}$  were considered. Left, middle, and right panels represent channels where  $r_f < 1500 \mu\text{m}$ ,  $1500 \leq r_f < 5250 \mu\text{m}$ , and  $r_f \geq 5250 \mu\text{m}$ , respectively. Top, middle, and bottom rows represent probability distributions for  $r^{\min}$ ,  $r^{\max}$ , and summed throat size, respectively. For all panels, the colors red, blue, and green represent channels where  $r_1 < 1500 \mu\text{m}$ ,  $1500 \leq r_1 < 5250 \mu\text{m}$ , and  $r_1 \geq 5250 \mu\text{m}$ , respectively.
